# Supplementary material for: Cyrene™ as a green alternative to N,N′-dimethylformamide (DMF) in the synthesis of MLCT-emissive ruthenium(ii) polypyridyl complexes for biological applications
Source: Royal Society of Chemistry journal article supplement (doi:10.1039/d4dt02676d), 2024-01-01
Supplement: d4dt02676d1.pdf [file d4dt02676d1.pdf]

## Supplementary Information for:

### **Cyrene<sup>TM</sup> as a green alternative to N,N'-dimethylformamide (DMF) in the synthesis of MLCT-emissive ruthenium(II) polypyridyl complexes for biological applications**

Steffan D. James,<sup>‡</sup> Christopher E. Elgar,<sup>‡</sup> Dandan Chen, Matthew I. Lewis, Elias T. L. Ash, Dominic S. Conway, Benjamin J. Tuckley, Leigh E. Phillips, Natalia Kolozsvari, Xiaohe Tian\* and Martin R. Gill\*

<sup>a</sup>Department of Chemistry, Faculty of Science and Engineering, Swansea University, Swansea, UK

<sup>b</sup>State Key Laboratory of Biotherapy, Department of Radiology and National Clinical Research Center for Geriatrics, Huaxi MR Research Center (HMRRC), Frontiers Science Center for Disease-Related Molecular Network, West China Hospital of Sichuan University, Sichuan University, Chengdu 610000, Sichuan Province, China

<sup>‡</sup> These authors contributed equally to this work.

Email: [m.r.gill@swansea.ac.uk](mailto:m.r.gill@swansea.ac.uk) or [xiaohe.t@wchscu.cn](mailto:xiaohe.t@wchscu.cn)

## Experimental

### General Information

All chemical reagents and solvents were purchased from commercial sources (Sigma-Aldrich, ThermoScientific) and used as supplied. <sup>1</sup>H and <sup>13</sup>C NMR spectra were obtained using a Bruker Advance III 500 MHz Nuclear Magnetic Resonance Spectrometer. HRMS (high resolution mass spectroscopy) samples were analysed at the EPSRC UK National Mass Spectrometry Facility at Swansea University using a ThermoScientific LTQ Orbitrap XL 1 Mass Spectrometer. Fourier Transform Infrared Spectra were run on a Perkin Elmer FT-IR Spectrometer Spectrum TWO. Elemental analysis was performed by the Elemental Analysis Service at London Metropolitan University. Microwave-assisted synthesis was performed on a CEM Discover 2.0 microwave synthesis reactor operating at a power maximum level of 150 W. The reactions were carried out in sealed glass tubes (15 mL) equipped with stirring bars.

### Synthesis and characterisation

#### **Ru(N<sup>^</sup>N)<sub>2</sub>Cl<sub>2</sub> complexes:**

RuCl<sub>3</sub>·3H<sub>2</sub>O (100 mg, 1 molar equivalent), LiCl (113 mg, 7 mol. eq.), ascorbic acid (68 mg, 0.5 mol. eq.) and the required N<sup>N</sup> ligand (2 mol. eq.) were dissolved into 5 mL Cyrene with stirring and gentle heating. In the case of N<sup>N</sup> = bpy, no ascorbic acid was employed. The mixture was heated to the desired temperature for the stated reaction time. The reaction was cooled to room temperature, excess acetone added (20-50 mL) and stored overnight at 4 °C. The precipitated solid was collected by vacuum filtration and washed thoroughly with water and ether. Reactions using DMF were performed as described previously,<sup>1</sup> using a modification of the original method described by Sullivan et al.<sup>2</sup>

### **Ru(bpy)<sub>2</sub>Cl<sub>2</sub>**

Cyrene<sup>TM</sup> conditions: Yield: 145 mg, 79%; dark purple solid; Elemental analysis (%) calcd (found) for Ru(bpy)<sub>2</sub>Cl<sub>2</sub>·H<sub>2</sub>O: C 47.82 (47.53), H 3.61 (3.78), N 11.15 (10.11). HRMS: [M-Cl]<sup>+</sup> calcd 449.01, found 449.0105.

DMF conditions: Yield: 125 mg, 68%; dark purple solid; Elemental analysis (%) calcd (found) for Ru(bpy)<sub>2</sub>Cl<sub>2</sub>·H<sub>2</sub>O: C 47.82 (47.9), H 3.61 (3.31), N 11.15 (10.72). HRMS: [M-Cl]<sup>+</sup> calcd 449.01, found 449.0100.

### **Ru(phen)<sub>2</sub>Cl<sub>2</sub>**

Cyrene<sup>TM</sup> conditions: Yield: 134 mg, 67%; dark purple solid; Elemental analysis (%) calcd (found) for Ru(phen)<sub>2</sub>Cl<sub>2</sub>·H<sub>2</sub>O: C 52.37 (52.12), H 3.30 (3.52), N 10.18 (8.57). HRMS: [M-Cl]<sup>+</sup> calcd 497.01, found 497.0009.

DMF conditions: Yield: 160 mg, 80%; dark purple solid; Elemental analysis (%) calcd (found) for Ru(phen)<sub>2</sub>Cl<sub>2</sub>·H<sub>2</sub>O: C 52.37 (51.28), H 3.30 (2.3), N 10.18 (10.39). HRMS: [M+Na]<sup>+</sup> calcd 554.97, found 554.9678.

### **Ru(4,4'-dmbpy)<sub>2</sub>Cl<sub>2</sub>**

Cyrene<sup>TM</sup> conditions: Yield: 101 mg, 49%; brown/black solid; Elemental analysis (%) calcd (found) for Ru(4,4'-dmbpy)<sub>2</sub>Cl<sub>2</sub>: C 53.3 (51.0), H 4.48 (3.53), N 10.4 (9.07). HRMS: [M-Cl]<sup>+</sup> calcd 505.07, found 505.0736.

DMF conditions: 111 mg, Yield: 54%; brown/black solid; Elemental analysis (%) calcd (found) for Ru(4,4'-dmbpy)<sub>2</sub>Cl<sub>2</sub>: C 53.3 (46.57), H 4.48 (3.4), N 10.4 (9.62). HRMS: [M-Cl]<sup>+</sup> calcd 505.07, found 505.0731.

### **Ru(5,5'-dmbpy)<sub>2</sub>Cl<sub>2</sub>**

Cyrene<sup>TM</sup> conditions: Yield: 138 mg, 67%; brown/black solid; Elemental analysis (%) calcd (found) for Ru(5,5'-dmbpy)<sub>2</sub>Cl<sub>2</sub>: C 53.3 (48.84), H 4.48 (4.09), N 10.4 (9.41). HRMS: [M-Cl]<sup>+</sup> calcd 505.07, found 505.0729.

DMF conditions: Yield: 82 mg, 40%; brown/black solid; Elemental analysis (%) calcd (found) for Ru(5,5'-dmbpy)<sub>2</sub>Cl<sub>2</sub>: C 53.3 (48.86), H 4.48 (3.91), N 10.4 (9.41). HRMS: [M-Cl]<sup>+</sup> calcd 505.07, found 505.0730.

### **Ru(tmphen)<sub>2</sub>Cl<sub>2</sub>**

Cyrene<sup>TM</sup> conditions: Yield: 135 mg, 55%; dark purple solid; Elemental analysis (%) calcd (found) for Ru(tmphen)<sub>2</sub>Cl<sub>2</sub>·3H<sub>2</sub>O: C 55.01 (53.44), H 5.48 (3.85), N 8.02 (7.5). HRMS: [M]<sup>+</sup> calcd 644.10, found 644.1013.

DMF conditions: 199 mg, 81%; dark purple solid; Elemental analysis (%) calcd (found) for Ru(tmphen)<sub>2</sub>Cl<sub>2</sub>: C 59.6 (61.91), H 5.0 (4.31), N 8.7 (9.19). HRMS: [M]<sup>+</sup> calcd 644.10, found 644.1042.

### **[Ru(N<sup>N</sup>)<sub>3</sub>]<sup>2+</sup> complexes:**

#### **[Ru(bpy)<sub>3</sub>](PF<sub>6</sub>)<sub>2</sub>**

*cis*-Ru(bpy)<sub>2</sub>Cl<sub>2</sub> (100 mg, 0.206 mmol) was reacted with 2,2-bipyridine (32 mg, 0.205 mmol) in a minimum volume of ethylene glycol (~7 mL) for 25 minutes at 160 °C in the microwave reactor. The solution was poured over water (10 mL) and excess NH<sub>4</sub>PF<sub>6</sub> was added. The precipitate was collected by vacuum filtration and recrystallised in 1:1 methanol:water. The solid was washed with water and diethyl ether, before drying in an oven. Yield: 83 mg, 47%; Orange solid; <sup>1</sup>H NMR (500 MHz, DMSO) δ 8.85 (d, *J* = 8.1 Hz, 1H), 8.18 (t, *J* = 7.5 Hz, 1H), 7.74 (d, *J* = 5.4 Hz, 1H), 7.54 (t, *J* = 6.5 Hz, 1H). <sup>13</sup>C NMR (126 MHz, DMSO) δ 157.01, 151.67, 138.39, 128.35, 124.94. HRMS: [M-PF<sub>6</sub>]<sup>+</sup> calcd 715.07, found 715.0757. [M-2PF<sub>6</sub>]<sup>2+</sup> calcd 285.06, found 285.0556. Elemental analysis (%) calcd for [Ru(bpy)<sub>3</sub>](PF<sub>6</sub>)<sub>2</sub> (found): C 41.92 (40.42), H 2.81 (2.42), N 9.78 (7.74). HPLC purity: 99.07%, retention time = 1.403 min.

#### **[Ru(phen)<sub>3</sub>](PF<sub>6</sub>)<sub>2</sub>**

The same method as for [Ru(bpy)<sub>3</sub>](PF<sub>6</sub>)<sub>2</sub> was employed using *cis*-Ru(phen)<sub>2</sub>Cl<sub>2</sub> (60 mg, 0.113 mmol) and 1,10 phenanthroline (20 mg, 0.113 mmol) in ethylene glycol (~5 mL). Yield: 47 mg, 42%; Orange solid; <sup>1</sup>H NMR (500 MHz, DMSO) δ 8.78 (dd, *J* = 8.3, 1.1 Hz, 1H), 8.39 (s, 1H), 8.09 (dd, *J* = 5.2, 1.1 Hz, 1H), 7.77 (dd, *J* = 8.2, 5.3 Hz, 1H). <sup>13</sup>C NMR (126 MHz, DMSO) δ 153.22, 147.71, 137.28, 130.91, 128.51, 126.77. HRMS: [M-PF<sub>6</sub>]<sup>+</sup> calcd 787.07, found 787.0760. [M-2PF<sub>6</sub>]<sup>2+</sup> calcd 321.06, found 321.0558. Elemental analysis (%) calcd for [Ru(phen)<sub>3</sub>](PF<sub>6</sub>)<sub>2</sub> (found): C 46.41 (46.16), H 2.6 (1.89), N 9.02 (8.30). HPLC purity: 99.8%, retention time = 1.535 min.

#### **[Ru(4,4'-dmbpy)<sub>3</sub>](PF<sub>6</sub>)<sub>2</sub>**

The same method as for  $[\text{Ru}(\text{bpy})_3](\text{PF}_6)_2$  was employed using *cis*- $\text{Ru}(4,4'\text{-dmbpy})_2\text{Cl}_2$  (50 mg, 0.092 mmol) and 4,4-dimethyl bipyridine (17 mg, 0.092 mmol) in ethylene glycol (~5 mL). Yield = 32 mgs, 37%; Orange solid.  $^1\text{H}$  NMR (500 MHz, DMSO)  $\delta$  8.69 (s, 1H), 7.54 (d,  $J$  = 5.8 Hz, 1H), 7.34 (d,  $J$  = 5.6 Hz, 1H), 2.51 (s, 4H).  $^{13}\text{C}$  NMR (126 MHz, DMSO)  $\delta$  156.65, 150.71, 149.76, 128.90, 125.41, 21.18. HR HRMS:  $[\text{M-PF}_6]^+$  calcd 799.17, found 799.1707.  $[\text{M-2PF}_6]^{2+}$  calcd 327.10, found 327.1029. Elemental analysis (%) calcd for  $[\text{Ru}(4,4'\text{-dmbpy})_3](\text{PF}_6)_2$  (found): C 45.8 (46.74), H 3.85 (2.79), N 8.91 (7.99). HPLC purity: 99.8%, retention time = 1.982 min.

### **$[\text{Ru}(\text{tmphen})_3](\text{PF}_6)_2$**

The same method as for  $[\text{Ru}(\text{bpy})_3](\text{PF}_6)_2$  was employed using *cis*- $\text{Ru}(\text{tmphen})_2\text{Cl}_2$  (95 mg, 0.14 mmol) and 2,3,7,8 tetramethyl 1,10 phenanthroline (33 mg, 0.14 mmol) in ethylene glycol (~7 mL). Yield = 80 mg, 51%; Brown solid.  $^1\text{H}$  NMR (500 MHz, DMSO)  $\delta$  8.47 (s, 1H), 7.68 (s, 1H), 2.77 (s, 3H), 2.21 (s, 3H).  $^{13}\text{C}$  NMR (126 MHz, DMSO)  $\delta$  152.39, 146.48, 144.57, 134.91, 129.20, 124.74, 18.06, 15.01. HRMS:  $[\text{M-PF}_6]^+$  calcd 955.26, found 955.2654.  $[\text{M-2PF}_6]^{2+}$  calcd 405.15, found 405.1498. Elemental analysis (%) calcd for  $[\text{Ru}(\text{tmphen})_3](\text{PF}_6)_2 + \text{PF}_6$  (found): C 46.31 (46.27), H 3.89 (3.61), N 6.75 (6.82). HPLC purity: 96.04%, retention time = 4.893 min.

### **$[\text{Ru}(\text{N}^{\wedge}\text{N})_2(\text{N}^{\wedge}\text{N})]^{2+}$ complexes:**

#### **$[\text{Ru}(\text{tmphen})_2(\text{DIP})](\text{PF}_6)_2$**

The same method as for  $[\text{Ru}(\text{bpy})_3](\text{PF}_6)_2$  was employed using *cis*- $\text{Ru}(\text{tmphen})_2\text{Cl}_2$  (124 mg, 0.19 mmol) and 4,7-Diphenyl-1,10-phenanthroline (64 mg, 0.19 mmol) in ethylene glycol (~7 mL). Yield: 182 mg, 80 %; Orange/brown solid;  $^1\text{H}$  NMR (500 MHz,  $\text{CD}_3\text{CN}$ )  $\delta$  8.42 (s, 2H), 8.19 (s, 2H), 8.04 (d,  $J$  = 5.5 Hz, 1H), 7.84 (s, 1H), 7.79 (s, 1H), 7.70 (s, 1H), 7.68 – 7.57 (m, 8H), 7.55 (d,  $J$  = 5.5 Hz, 1H), 2.82 (s, 4H), 2.30 (s, 4H).  $^{13}\text{C}$  NMR (126 MHz,  $\text{CD}_3\text{CN}$ )  $\delta$  153.44, 153.17, 152.55, 149.49, 148.96, 147.07, 145.17, 136.40, 135.40, 135.20, 130.40, 130.12, 129.66, 126.52, 126.27, 124.67, 17.36, 14.62. HRMS:  $[\text{M-PF}_6]^+$  calcd 1051.26, found 1051.2633.  $[\text{M-2PF}_6]^{2+}$  calcd 453.15, found 453.1492. Elemental analysis (%) calcd for  $[\text{Ru}(\text{tmphen})_2(\text{DIP})](\text{PF}_6)_2 + \text{PF}_6$  (found): C 50.16 (51.69), H 3.16 (3.05), N 6.27 (6.11). HPLC purity: 90.7%, retention time = 13.428 min.

#### **$[\text{Ru}(\text{bpy})_2(\text{dppz})](\text{PF}_6)_2$**

Dppz and  $[\text{Ru}(\text{bpy})_2(\text{dppz})](\text{PF}_6)_2$  were synthesised as described previously.<sup>3</sup>

Dppz:  $^1\text{H}$  NMR (500 MHz,  $\text{CDCl}_3$ )  $\delta$  9.70 (dd,  $J$  = 8.1, 1.6 Hz, 1H), 9.32 (d,  $J$  = 3.1 Hz, 1H), 8.40 (dd,  $J$  = 6.5, 3.4 Hz, 1H), 7.97 (dd,  $J$  = 6.5, 3.4 Hz, 1H), 7.85 (dd,  $J$  = 8.1, 4.4 Hz, 1H).  $^{13}\text{C}$  NMR (126 MHz,  $\text{CDCl}_3$ )  $\delta$  152.44, 142.58, 141.08, 134.08, 130.81, 129.61, 127.74, 124.31.

$[\text{Ru}(\text{bpy})_2(\text{dppz})](\text{PF}_6)_2$ :  $^1\text{H}$  NMR (500 MHz,  $\text{CD}_3\text{CN}$ )  $\delta$  9.65 (d,  $J$  = 8.2 Hz, 1H), 8.58 (dd,  $J$  = 15.8, 8.1 Hz, 2H), 8.46 (dd,  $J$  = 6.5, 3.4 Hz, 1H), 8.31 – 8.09 (m, 3H), 8.10 – 7.86 (m, 3H), 7.79 (d,  $J$  = 5.5

Hz, 1H), 7.61 – 7.46 (m, 1H), 7.31 (m,  $J = 6.6$  Hz, 1H).  $^{13}\text{C}$  NMR (126 MHz,  $\text{CD}_3\text{CN}$ )  $\delta$  157.60, 154.31, 152.58, 151.05, 143.29, 140.58, 138.59, 134.06, 133.09, 131.42, 130.19, 128.23, 128.02, 124.88. HRMS:  $[\text{M-PF}_6]^+$  calcd 841.10, found 841.0974.  $[\text{M-2PF}_6]^{2+}$  calcd 348.07, found 348.0664. Elemental analysis (%) calcd for  $[\text{Ru}(\text{bpy})_2(\text{dppz})](\text{PF}_6)_2$  (found): C 46.3 (46.65), H 2.66 (2.45), N 11.37 (11.16). HPLC purity: 96.2%, retention time = 2.537 min.

### **10,11-dmdppz**

1,10-Phenanthroline-5,6-dione (0.136 g, 0.647 mmol) and 3,4-dimethyl-o-phenylenediamine (0.0993 g, 0.729 mmol) were dissolved in chloroform (7 mL). The mixture was refluxed under nitrogen for 3 hours before being cooled to room temperature. The light-yellow precipitate was filtered under vacuum and washed with ether. The solid was recrystallised with hot dichloromethane:ethanol (1:1), and then dried in an oven. Yield: 0.0952 g, 47%; Pale yellow solid;  $^1\text{H}$  NMR (500 MHz,  $\text{CDCl}_3$ )  $\delta$  9.68 (dd,  $J = 8.1, 1.6$  Hz, 1H), 9.63 (dd,  $J = 8.1, 1.6$  Hz, 1H), 9.32 – 9.24 (m, 2H), 8.10 (d,  $J = 8.7$  Hz, 1H), 7.88 – 7.77 (m, 2H), 7.75 (d,  $J = 8.7$  Hz, 1H), 2.98 (s, 3H), 2.65 (s, 3H).  $^{13}\text{C}$  NMR (126 MHz,  $\text{CDCl}_3$ )  $\delta$  152.21, 152.16, 148.21, 148.12, 141.58, 141.42, 139.68, 139.63, 138.60, 134.69, 134.20, 133.72, 133.60, 128.09, 127.75, 126.30, 124.07, 20.76, 13.15. HRMS:  $[\text{M+H}]^+$  calcd 311.13, found 311.1289.

### **$[\text{Ru}(\text{bpy})_2(10,11\text{-dmdppz})](\text{PF}_6)_2$**

$\text{Ru}(\text{bpy})_2\text{Cl}_2$  (0.193 g, 0.399 mmol) and 10,11-dmdppz (0.0832 g, 0.268 mmol) were added to a mixture of ethanol: water 1:1 (15 mL). The mixture was refluxed under nitrogen for 16 hours, then cooled to  $4^\circ\text{C}$  for 24 hours. Ethanol was removed by rotary evaporation and a saturated aqueous solution of ammonium hexafluorophosphate (1 mL) was added. The brown/orange precipitate was collected by vacuum filtration, washed with DI water and recrystallised using hot acetonitrile. The solid was collected by vacuum filtration, washed with ether, and dried *in vacuo*. Yield: 0.1736 g, 63 %; Orange solid;  $^1\text{H}$  NMR: (500 MHz, Acetone)  $\delta$  9.86 (d,  $J = 8.2$  Hz, 1H), 9.74 (d,  $J = 8.2$  Hz, 1H), 8.86 (dd,  $J = 17.3, 8.2$  Hz, 4H), 8.54 (d,  $J = 5.0$  Hz, 2H), 8.27 (dd,  $J = 17.2, 8.5$  Hz, 3H), 8.18 (dd,  $J = 16.0, 6.9$  Hz, 4H), 8.13 – 8.06 (m, 4H), 8.04 (d,  $J = 8.8$  Hz, 1H), 7.66 (t,  $J = 6.5$  Hz, 2H), 7.42 (t,  $J = 6.6$  Hz, 2H), 3.03 (s, 3H), 2.71 (s, 3H).  $^{13}\text{C}$  NMR: (126 MHz, Acetone)  $\delta$  157.52, 157.28, 153.63, 153.59, 152.29, 152.11, 141.74, 140.80, 138.71, 138.23, 138.12, 135.92, 134.94, 134.92, 133.81, 133.52, 131.28, 130.95, 127.93, 127.76, 127.59, 126.46, 124.51, 124.43, 19.91, 12.33. HRMS:  $[\text{M} - 2\text{PF}_6]^{2+}$  calcd 362.08, found 362.0820. Elemental analysis (%) calcd for  $[\text{Ru}(\text{bpy})_2(\text{dppz})](\text{PF}_6)_2$  (found): C 47.39 (52.38), H 2.98 (3.65), N 11.05 (11.05). HPLC purity: 97.36%, retention time = 2.551 min.

### **$[\text{Ru}(5,5'\text{-dmbpy})_2(10,11\text{-dmdppz})](\text{PF}_6)_2$**

The same method as for  $[\text{Ru}(\text{bpy})_2(10,11\text{-dmdppz})](\text{PF}_6)_2$  was employed using  $[\text{Ru}(5,5\text{-dmbpy})_2\text{Cl}_2]$  (0.148 g, 0.274 mmol) and 10,11-dmdppz (0.0641 g, 0.207 mmol). Yield: 0.120 g, 54 %; Orange solid;  $^1\text{H}$  NMR: (500 MHz, Acetone)  $\delta$  9.86 (d,  $J = 7.7$  Hz, 1H), 9.74 (d,  $J = 8.0$  Hz, 1H), 8.70 (dd,  $J = 20.8,$

8.4 Hz, 6H), 8.52 (d, J = 5.1 Hz, 3H), 8.28 (d, J = 8.9 Hz, 2H), 8.12 – 8.04 (m, 7H), 7.99 (d, J = 14.0 Hz, 4H), 7.90 (d, J = 7.8 Hz, 3H), 3.06 (s, 3H), 2.74 (s, 3H), 2.29 (s, 3H). <sup>13</sup>C NMR: (126 MHz, Acetone) δ 154.77, 151.91, 151.70, 138.67, 138.58, 138.28, 123.42, 123.31, 17.62, 17.39, 12.32. HRMS: [M – PF<sub>6</sub>]<sup>+</sup> calcd 925.19, found 925.1928. [M – 2PF<sub>6</sub>]<sup>2+</sup> calcd 390.12, found 390.1138. Elemental analysis (%) calcd for [Ru(bpy)<sub>2</sub>(dppz)](PF<sub>6</sub>)<sub>2</sub> (found): C 49.40 (54.47), H 3.58 (4.26), N 10.47 (11.36). HPLC purity: 98.71%, retention time = 4.918 min.

## HPLC

Reverse-phase HPLC was carried out on a Perkin-Elmer Altus HPLC system fitted with an Altus A-10 UV/Vis Detector and Waters XBridge C18 (130 Å, 3.5 μm, 4.6 x 150 mm) analytical column. Mobile phases: A = H<sub>2</sub>O [HPLC grade] (+ 0.1% trifluoroacetic acid, TFA, v/v) and B = CH<sub>3</sub>CN [HPLC grade] (+ 0.1% TFA, v/v). An isocratic HPLC method (50% A: 50% B) was used.

## DNA preparation

Calf thymus DNA (Sigma) was dissolved in Tris buffer (5 mM Tris, 200 mM NaCl, pH 7.5) and sonicated for 2 x 15 mins. Absorbances at 260 nm and at 280 nm were measured using UV/VIS spectrometer and  $A_{260\text{ nm}}/A_{280\text{ nm}} > 1.8$  indicated a protein free sample. The concentration of the CT DNA solution was determined by  $A_{260\text{ nm}}/\epsilon_{260\text{ nm}}$ , where  $\epsilon_{260\text{ nm}} = 6600\text{ dm}^3\text{ mol}^{-1}\text{ cm}^{-1}$ . Luminescence titrations were performed as described in a recent publication.<sup>4</sup> 5' Cy5.5-labeled oligonucleotides (sequence: AGGGTTAGGGTTAGGGTTAGGG) were purchased from Merck (HPLC purification standard) and used as supplied. G-quadruplex DNA was prepared as described in Waller et al. employing a 100 mM KCl and 10 mM Tris.HCl buffer at pH 7.4.<sup>5</sup> For DNA studies, complexes were converted to their chloride salts and dissolved in Tris buffer.

## Photophysical characterisation

Absorption spectra were recorded on a UV/VIS Lambda 365 Spectrometer (Perkin Elmer) and fluorescence spectra were run on an LS 55 Fluorescence Spectrometer (Perkin Elmer). Lifetime measurements were recorded on a FS5 Spectrofluorometer (Edinburgh Instruments) equipped with Multi-Channel Scaling and an EPL450 laser.

Relative luminescence quantum yields were calculated by Equation 1, where  $\Phi_D$  is quantum yield,  $m$  is the gradient of luminescence versus absorbance,  $\eta$  is a solvent refractive index. Subscripts D and std refer to donor and standard, respectively. Commercial  $[\text{Ru}(\text{bpy})_3]^{2+}$  was employed as the standard ( $\Phi_{\text{std}} = 0.018 \pm 0.002$  and  $0.040 \pm 0.002$  at  $\lambda_{\text{ex}} = 450\text{nm}$  in acetonitrile and water, respectively<sup>6</sup>). DNA bound quantum yields for **1** and **2** were obtained in  $5 \times 10^{-5}$  M calf-thymus DNA solution in 5 mM Tris.HCl, 200 mM NaCl, pH 7.5.

$$\Phi_D = \Phi_{\text{std}} \left( \frac{m_{dD}}{m_{\text{std}}} \right) \left( \frac{\eta_D^2}{\eta_{\text{std}}^2} \right) \quad \text{Equation 1}$$

Spectral overlap,  $J$ , was determined employing the normalized fluorescence emission spectrum of Cy5.5 and absorption spectrum of **1** or **2** scaled by peak molar absorption coefficient. Microsoft Excel was used to calculate the spectral overlap. Förster distance or radius,  $R_0$ , was determined by Equation 2 where  $J$  = spectral overlap,  $\kappa^2$  = orientation factor,  $\Phi_D$  = donor luminescence quantum yield,  $n$  = refractive index of the medium.

$$R_0^6 = 0.021 J \kappa^2 \Phi_D n^{-4} \quad \text{Equation 2}$$

### FRET binding assay

To determine binding, a concentration gradient of each compound (0.1 - 20  $\mu\text{M}$ ) was treated with 1  $\mu\text{M}$  of Cyanine 5.5 labelled G-quadruplex DNA in 96 well plates (black, optical bottom, Thermo). 2x concentrations were prepared in advance and mixed 1:1 in each well to achieve the desired concentrations. After 30 mins, fluorescence spectra ( $\lambda_{\text{ex}} = 450$  nm,  $\lambda_{\text{em}} = 550\text{-}850$  nm) were recorded by Tecan Infinite M Nano plate reader. The intensity of the FRET emission peak ( $\lambda_{\text{em}} = 710$  nm) for each compound concentration was measured, background subtracted and normalized to the maximum FRET intensity. Binding curves were generated, fit to a sigmoidal binding model (Origin) and  $K_d$  values extrapolated as the concentration required for 50 % binding, as described by Jarmoskaite et al.<sup>7</sup> All fits possessed R-squared values of 0.99 or greater.

### Cell culture

All cell lines were obtained from West China Hospital of Sichuan University (ChengDu, China). Cell lines were cultured in DMEM supplemented with 10% fetal bovine serum (FBS) and 1% penicillin/streptomycin antibiotic. Cells were maintained at 37 °C under a humidified atmosphere containing 5%  $\text{CO}_2$  and passaged using Trypsin.

### **Antiproliferative assay**

Cells were seeded at a density of  $5 \times 10^3$  cells per well in 96-well plates. After 24 h incubation, complex was added to cells at the indicated concentrations. After 48 h, 5 mg/mL 3-(4,5-dimethylthiazol-2-yl)-2,5-diphenyltetrazoliumbromide (MTT) reagent was added to each well. After 4 h incubation in the dark, 150  $\mu$ L of DMSO was added to each well, and the intensity of absorbance was determined by a microplate reader (BioTek Eon, America).

### **Confocal imaging**

Cells were seeded into a cell culture confocal dish for 24 h, then pretreated with complex at 37 °C in a CO<sub>2</sub> incubator. After washing with PBS three times, the luminescence of complex in cells was imaged by a Leica TCS SP5 confocal laser scanning microscope system. For fixed cell imaging, the cells were treated with 4% PFA for 30 minutes before adding the compound for imaging. Excitation wavelength 485 nm, emission wavelength 550-750 nm.

### **STED imaging**

STED nanoscopy experiments were performed under Leica DMI8 confocal microscopy equipped with Leica TCS SP5 STED-ONE unit and the compound was excited under STED laser, the emission signals were collected using HyD reflected light detectors (RLDs). Specimen cells were prepared using a similar method as normal confocal microscopy described previously, and donut laser was used in 775 nm STED laser (50% power), with 2048\*2048 pixels and \*100 scanning speed. Excitation wavelength 485 nm, emission wavelength 550-750 nm.



## **Supplementary Figures**

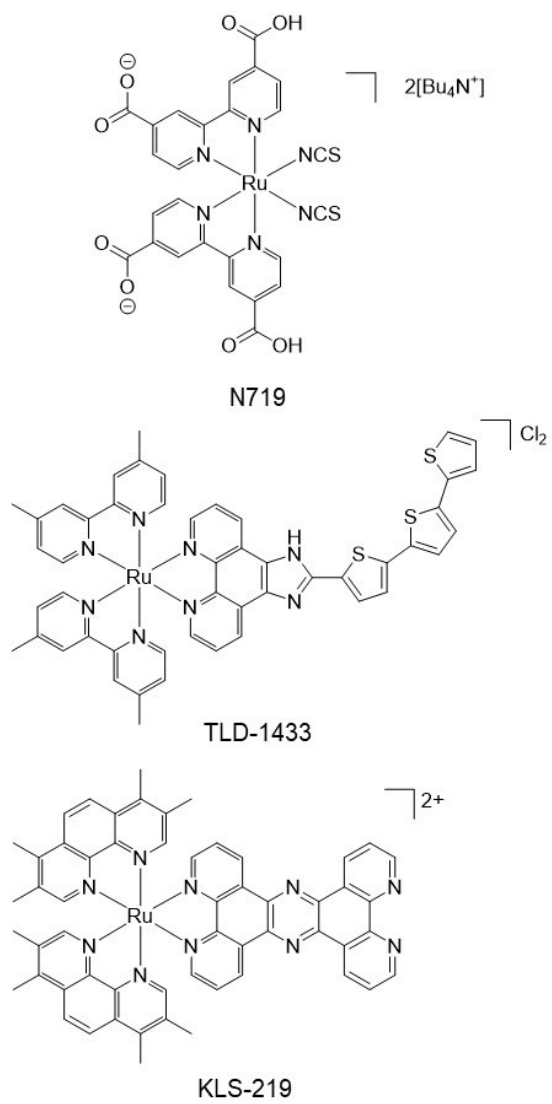

**Fig. S1** Structures of N719, TLD1433 and KLS-219.

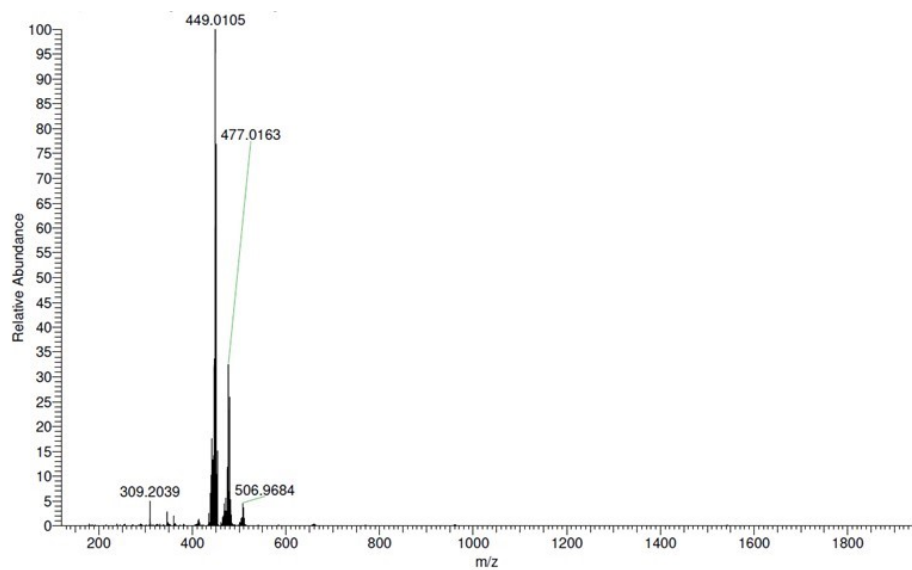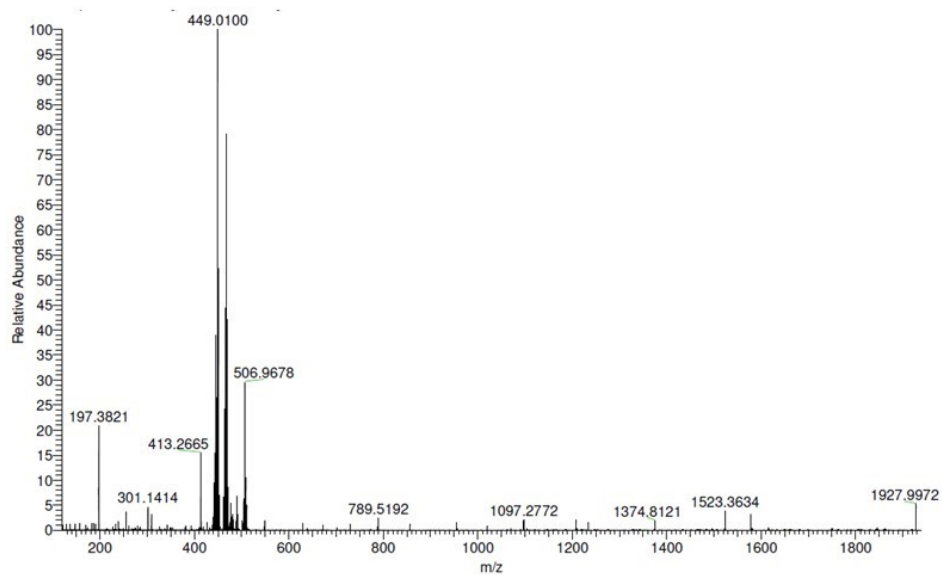

**Fig. S2** HRMS spectrum of Ru(bpy)<sub>2</sub>Cl<sub>2</sub> prepared via Cyrene™ (top) or DMF (bottom) pathways.

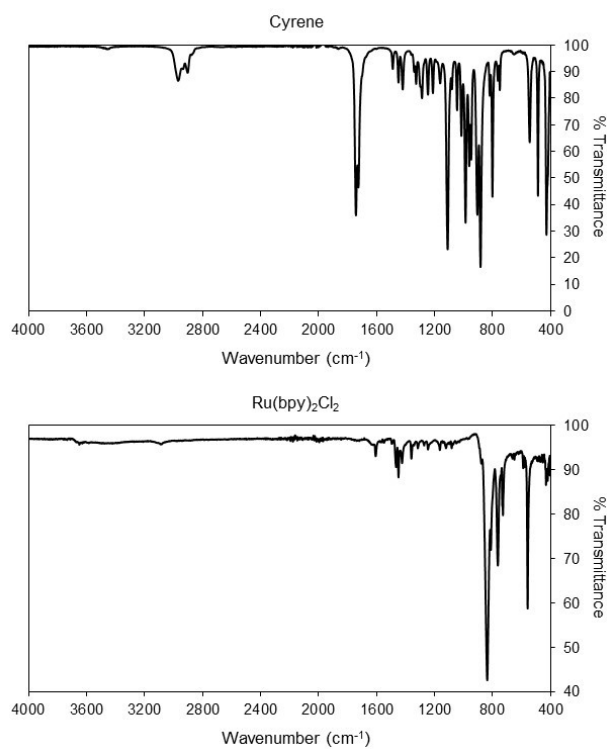

**Fig. S3** FT-IR of Cyrene<sup>TM</sup> (top) and Ru(bpy)<sub>2</sub>Cl<sub>2</sub> prepared via Cyrene<sup>TM</sup> pathway (bottom).

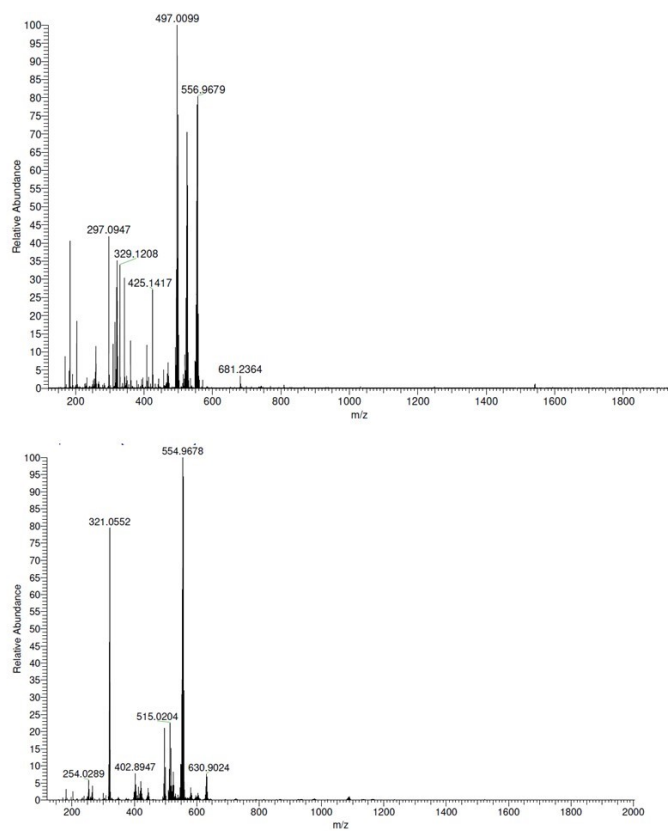

**Fig. S4** HRMS spectrum of Ru(phen)<sub>2</sub>Cl<sub>2</sub> prepared via Cyrene<sup>TM</sup> (top) or DMF (bottom) pathways.

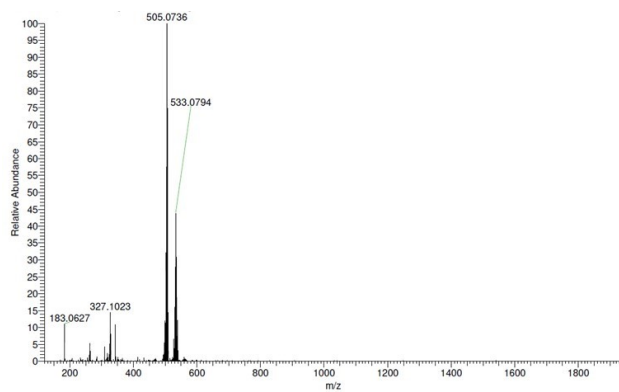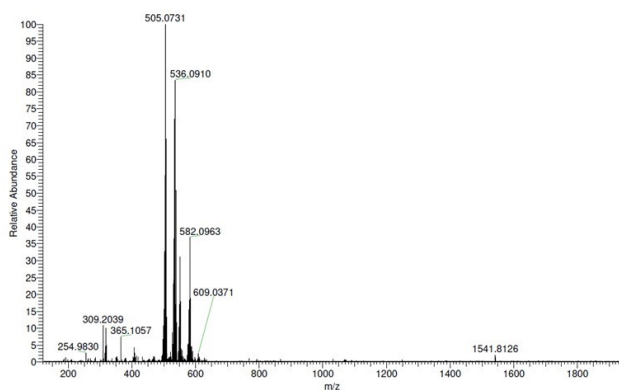

**Fig. S5** HRMS spectrum of Ru(4,4'-dmbpy)<sub>2</sub>Cl<sub>2</sub> prepared via Cyrene<sup>TM</sup> (top) or DMF (bottom) pathways.

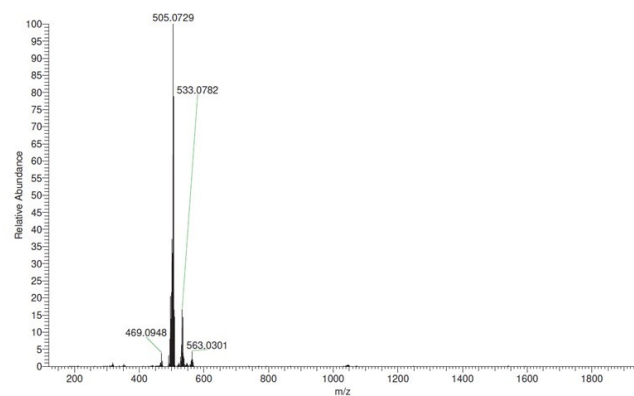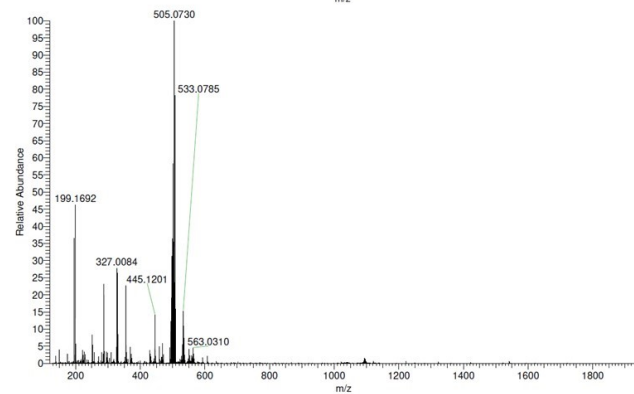

**Fig. S6** HRMS spectrum of Ru(5,5'-dmbpy)<sub>2</sub>Cl<sub>2</sub> prepared via Cyrene<sup>TM</sup> (top) or DMF (bottom) pathways.

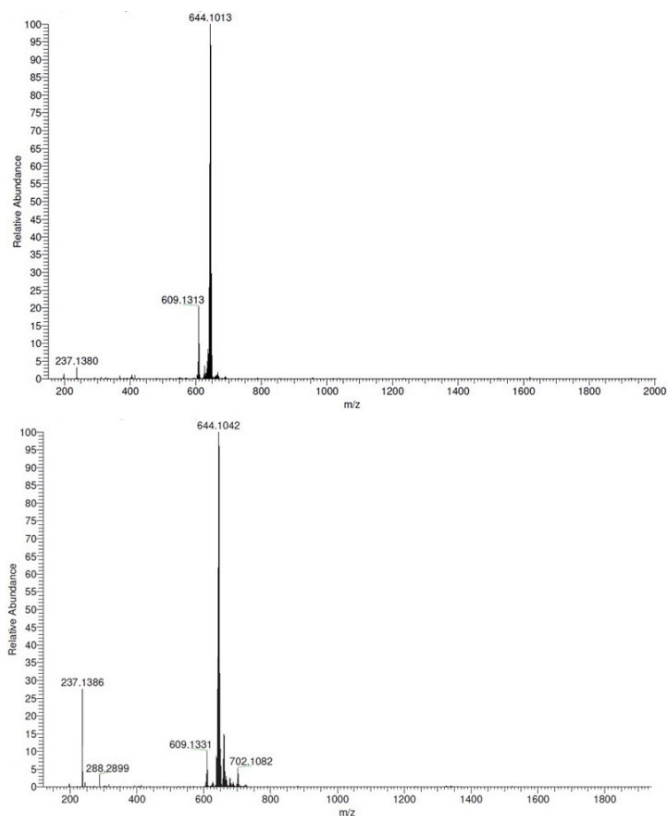

**Fig. S7** HRMS spectrum of Ru(tmp)<sub>2</sub>Cl<sub>2</sub> prepared via Cyrene™ (top) or DMF (bottom) pathways.

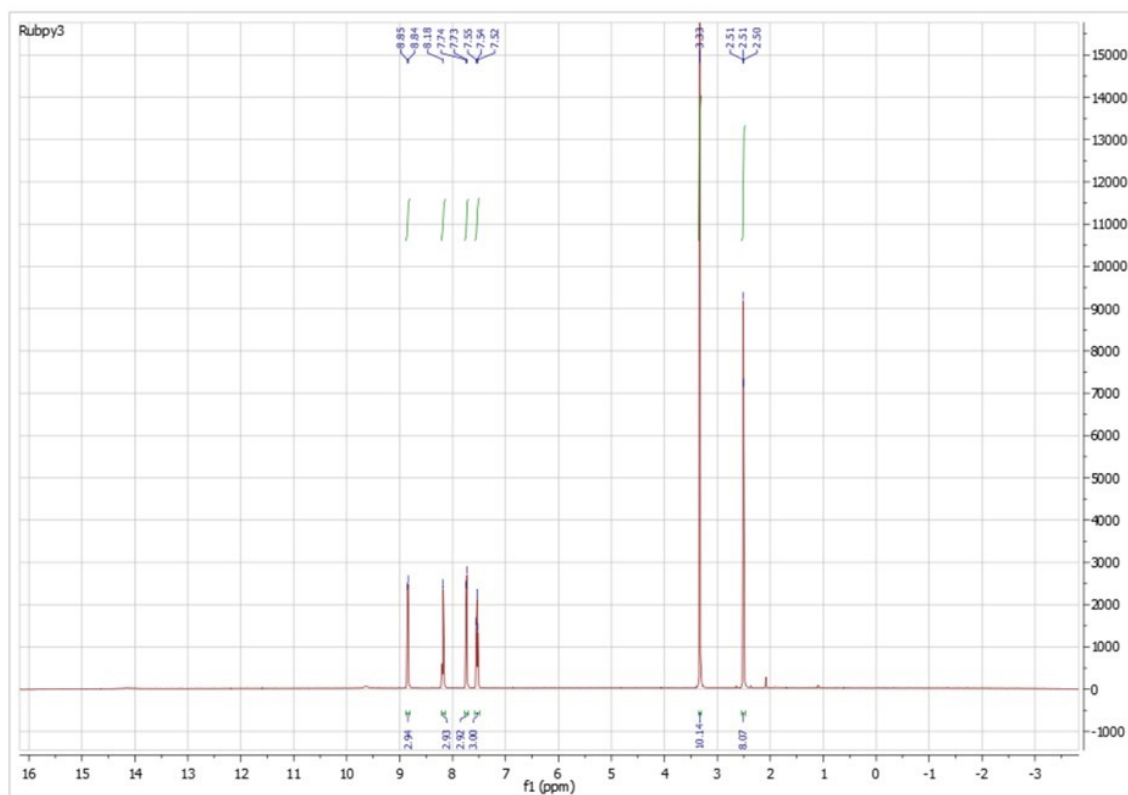

**Fig. S8** <sup>1</sup>H NMR (500 MHz, DMSO) spectrum of [Ru(bpy)<sub>3</sub>](PF<sub>6</sub>)<sub>2</sub>.

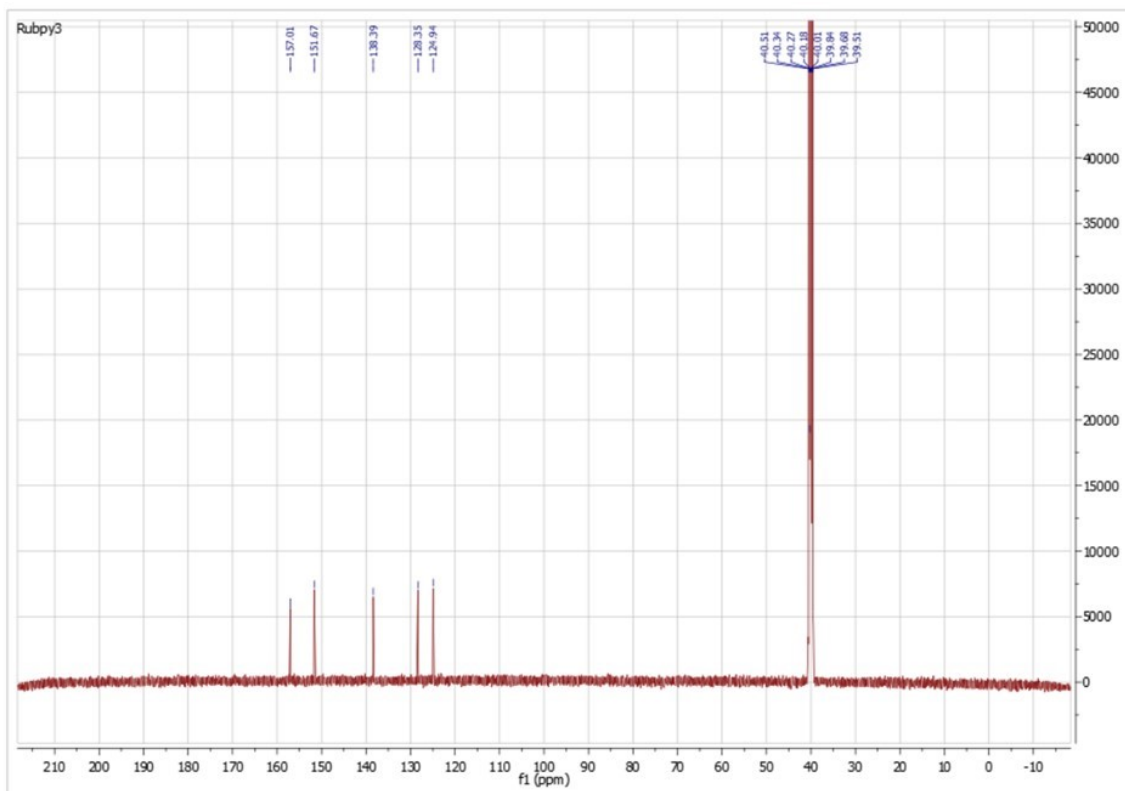

**Fig. S9**  $^{13}\text{C}$  NMR (126 MHz, DMSO) spectrum of  $[\text{Ru}(\text{bpy})_3](\text{PF}_6)_2$ .

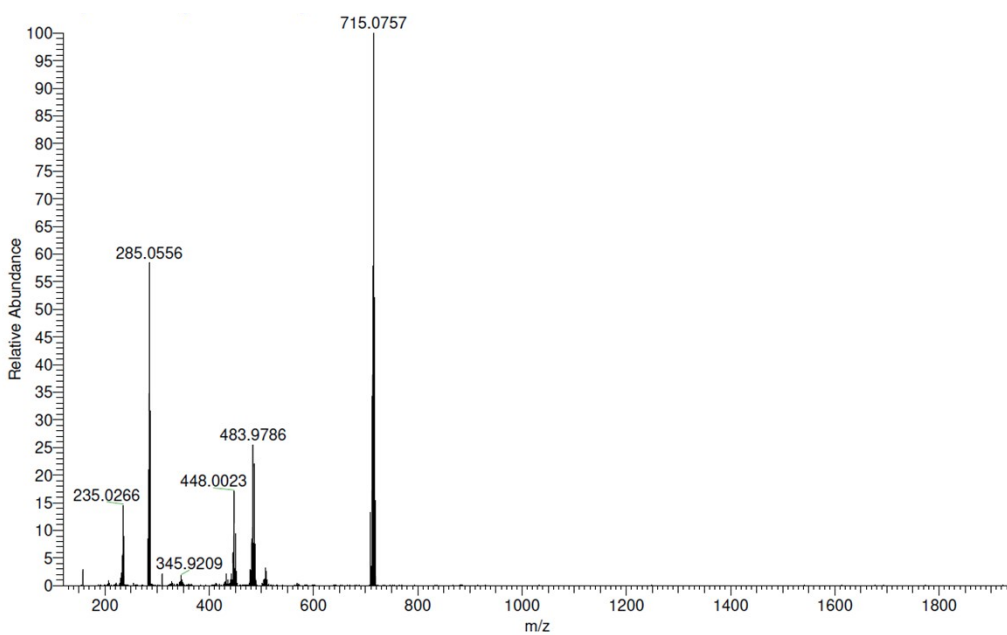

**Fig. S10** HRMS spectrum of  $[\text{Ru}(\text{bpy})_3](\text{PF}_6)_2$ .

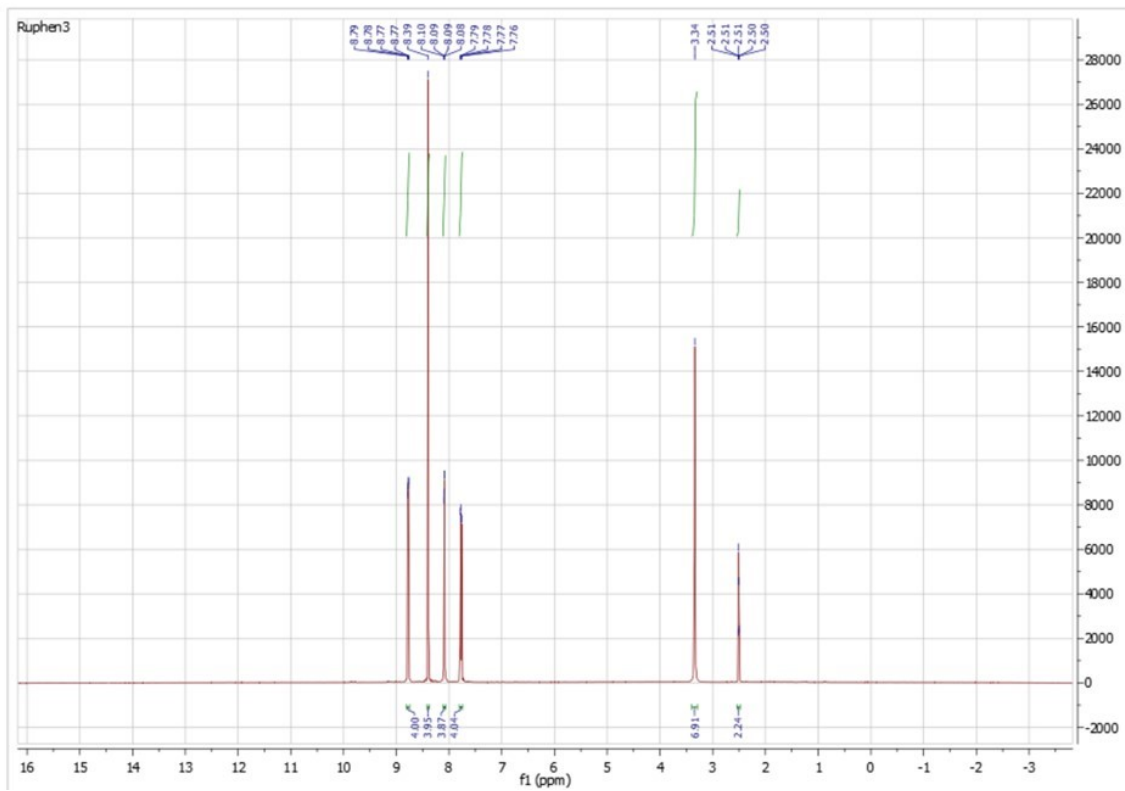

**Fig. S11**  $^1\text{H}$  NMR (500 MHz, DMSO) spectrum of  $[\text{Ru}(\text{phen})_3](\text{PF}_6)_2$ .

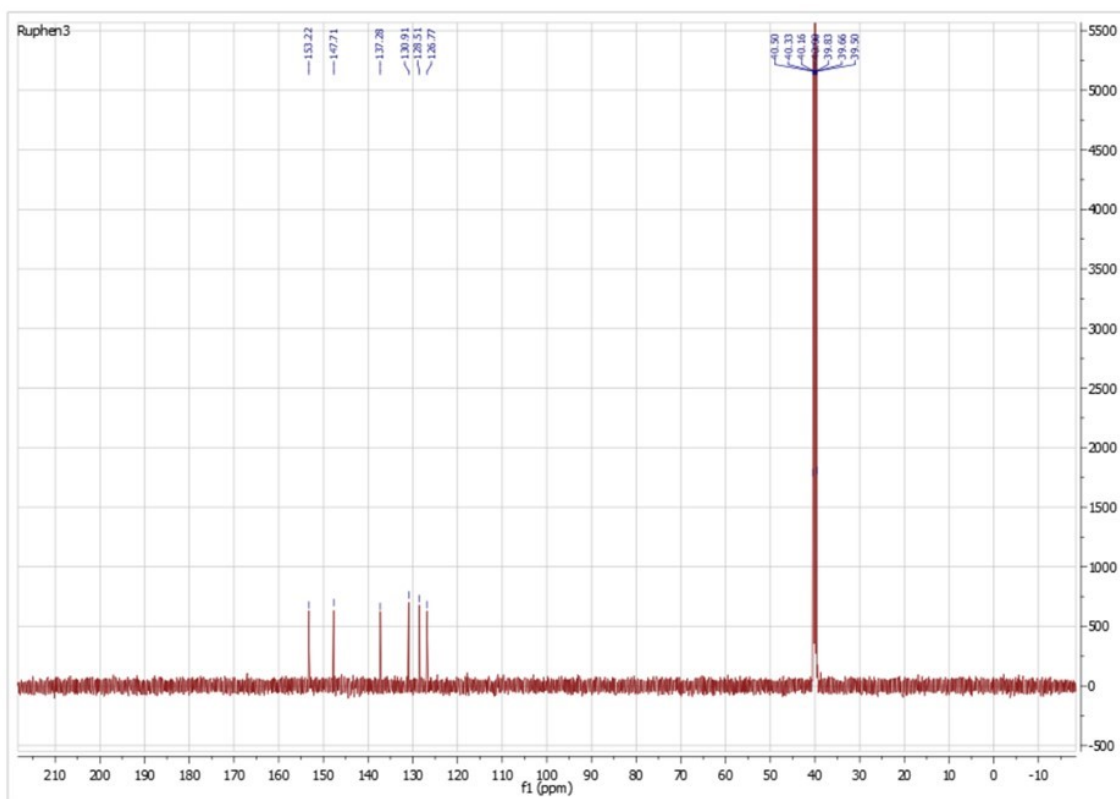

**Fig. S12**  $^{13}\text{C}$  NMR (126 MHz, DMSO) spectrum of  $[\text{Ru}(\text{phen})_3](\text{PF}_6)_2$ .



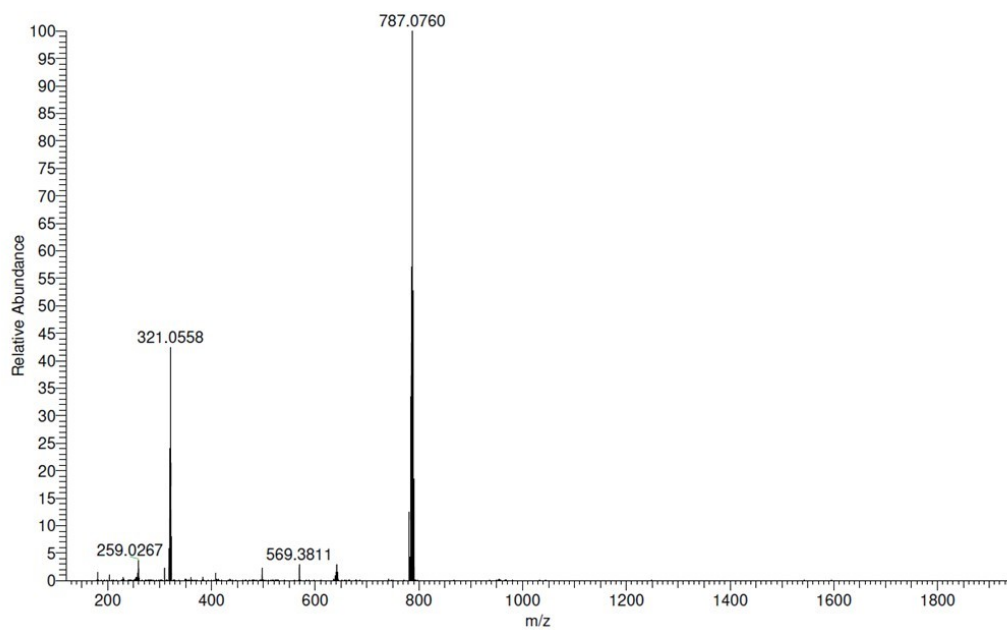

**Fig. S13** HRMS spectrum of [Ru(phen)<sub>3</sub>](PF<sub>6</sub>)<sub>2</sub>.

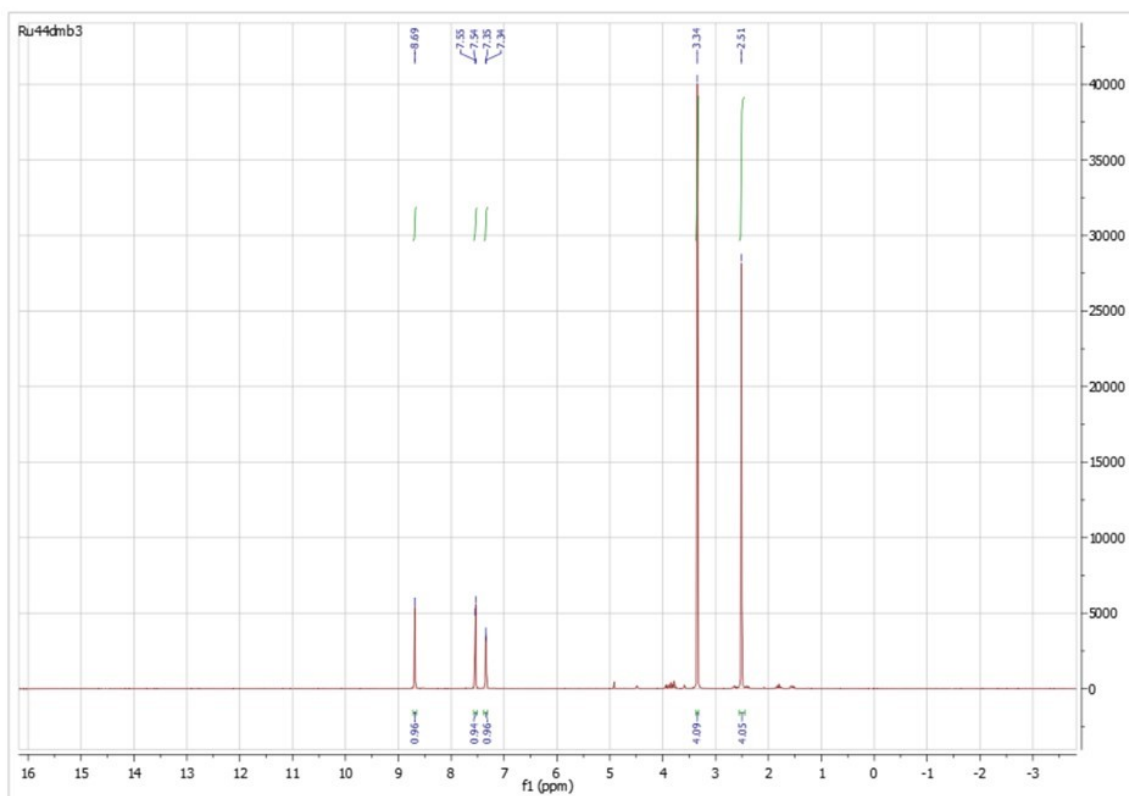

**Fig. S14** <sup>1</sup>H NMR (500 MHz, DMSO) spectrum of [Ru(4,4'-dmbpy)<sub>3</sub>](PF<sub>6</sub>)<sub>2</sub>.

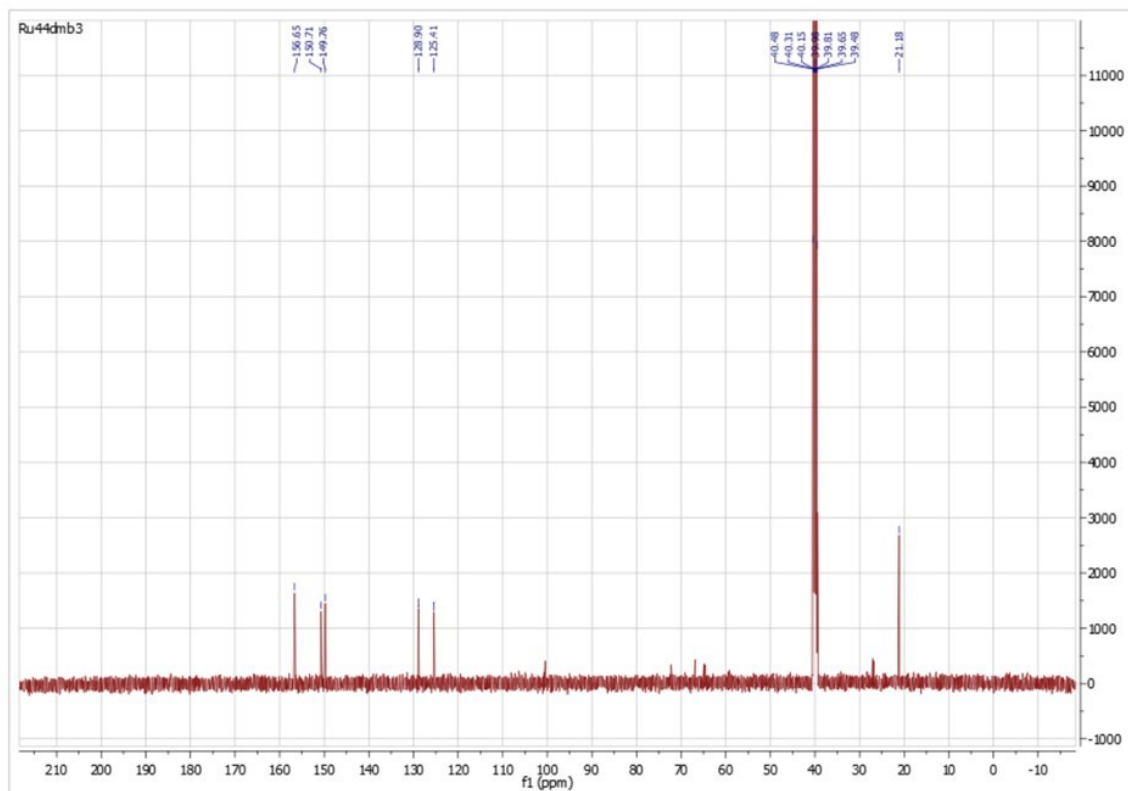

**Fig. S15**  $^{13}\text{C}$  NMR (126 MHz, DMSO) spectrum of  $[\text{Ru}(4,4'\text{-dmbpy})_3](\text{PF}_6)_2$ .

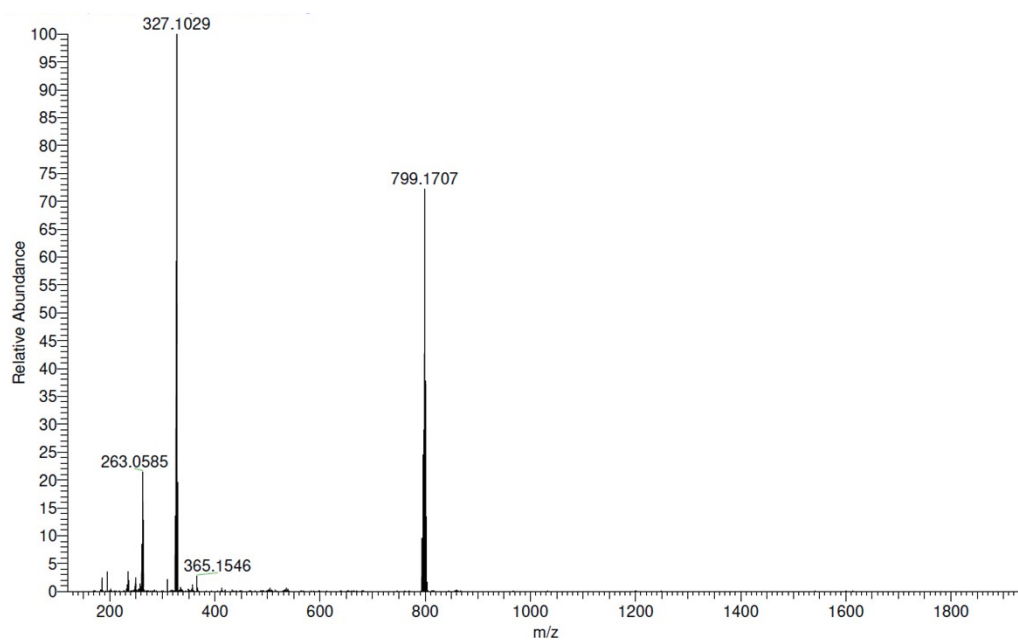

**Fig. S16** HRMS spectrum of  $[\text{Ru}(4,4'\text{-dmbpy})_3](\text{PF}_6)_2$ .

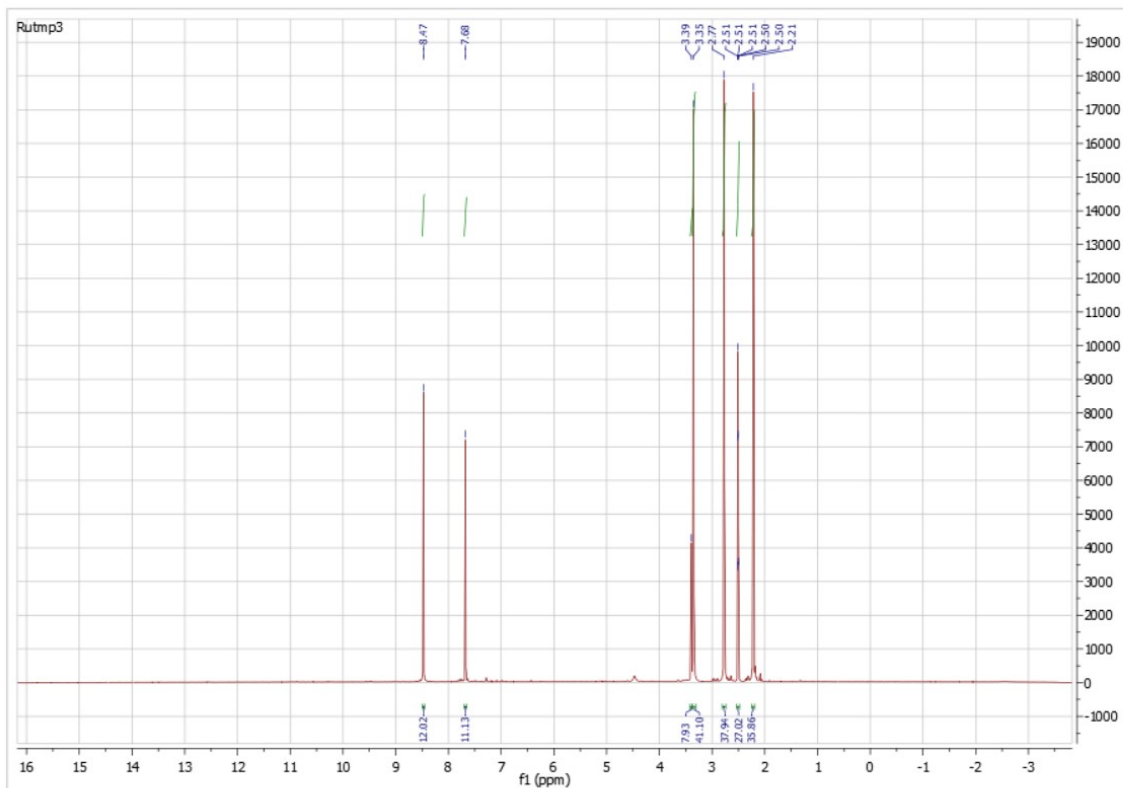

Fig. S17  $^1\text{H}$  NMR (500 MHz, DMSO) spectrum of  $[\text{Ru}(\text{tmphen})_3](\text{PF}_6)_2$ .

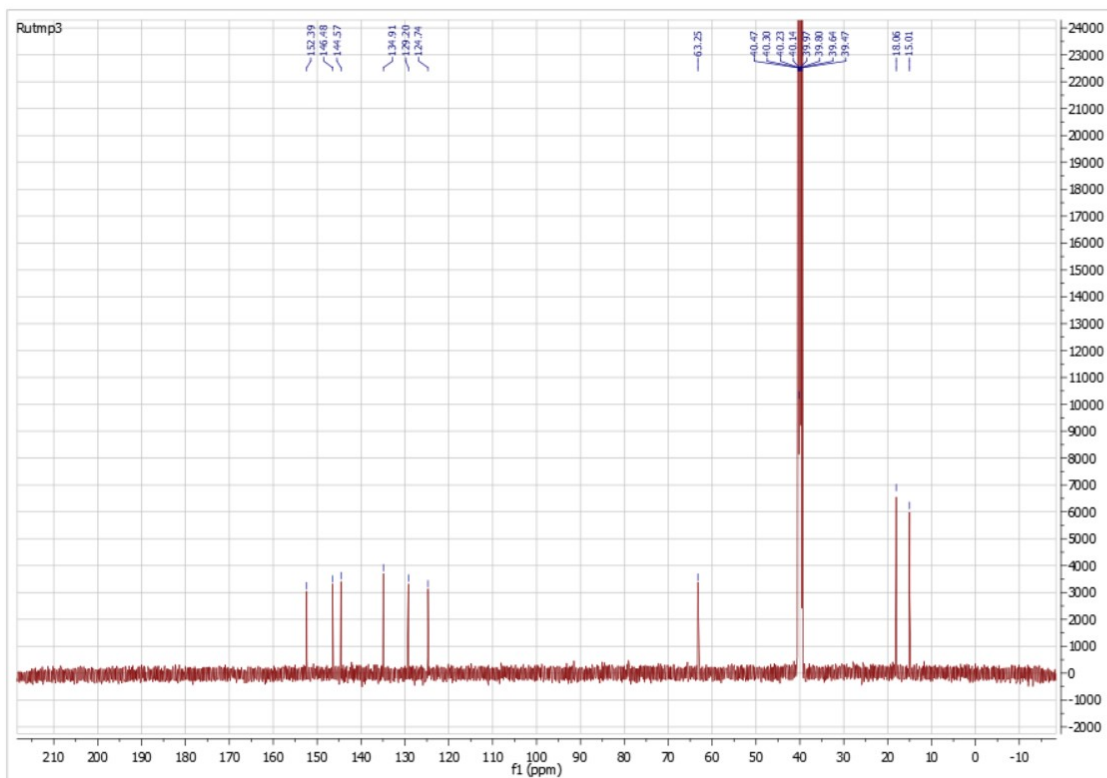

Fig. S18  $^{13}\text{C}$  NMR (126 MHz, DMSO) spectrum of  $[\text{Ru}(\text{tmphen})_3](\text{PF}_6)_2$ .

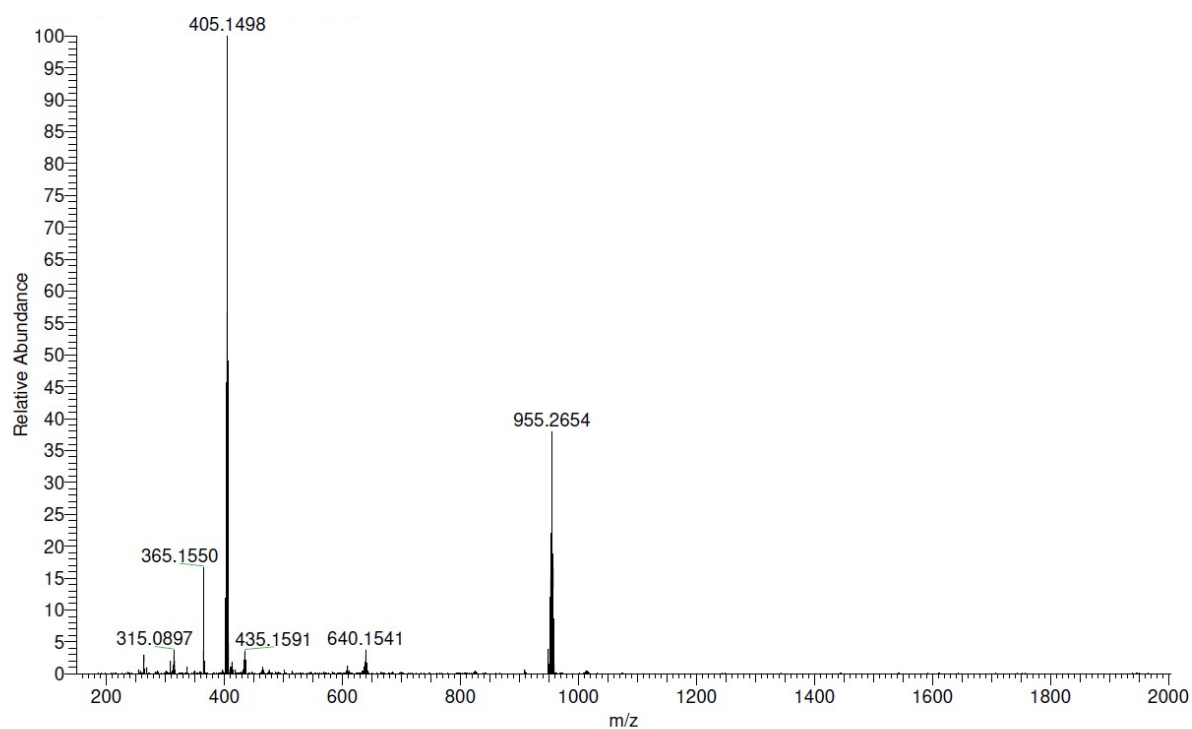

**Fig. S19** HRMS spectrum of  $[\text{Ru}(\text{tmphen})_3](\text{PF}_6)_2$ .

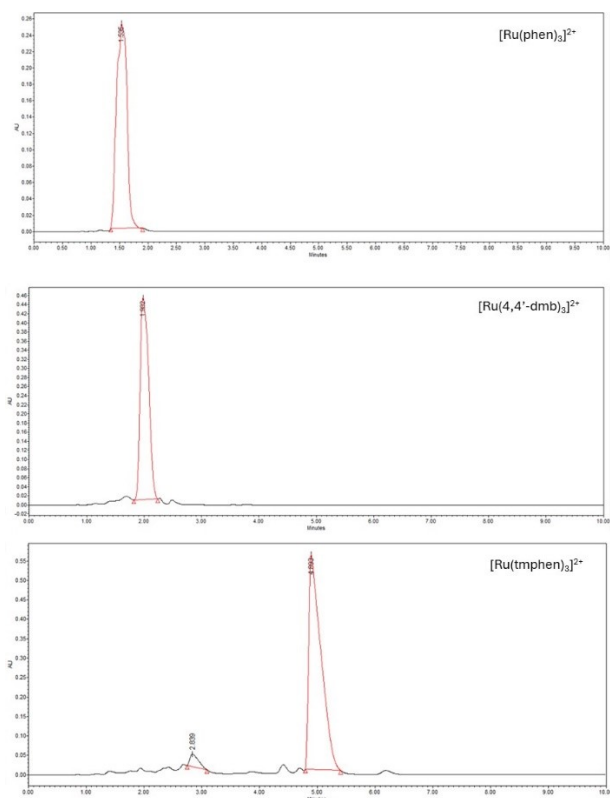

**Fig. S20** HPLC of  $[\text{Ru}(\text{phen})_3](\text{PF}_6)_2$  (top),  $[\text{Ru}(4,4'\text{-dmbpy})_3](\text{PF}_6)_2$  (middle) and  $[\text{Ru}(\text{tmphen})_3](\text{PF}_6)_2$  (bottom).

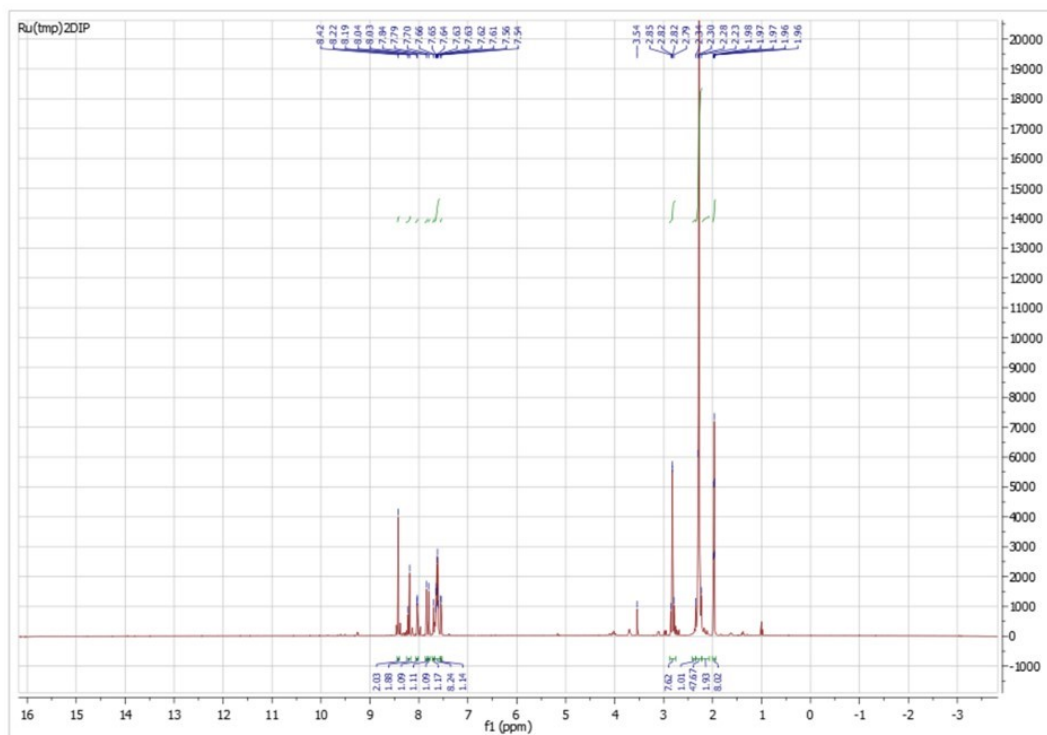

Fig. S21  $^1\text{H}$  NMR (500 MHz,  $\text{CD}_3\text{CN}$ ) spectrum of  $[\text{Ru}(\text{tmphen})_2(\text{DIP})](\text{PF}_6)_2$ .

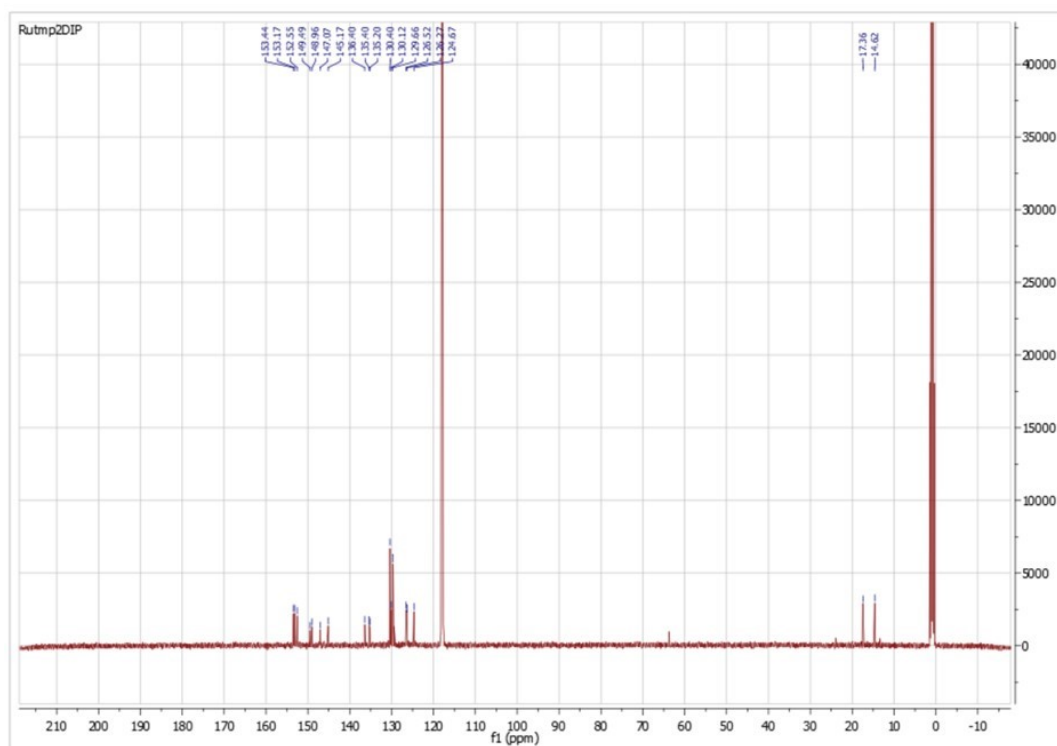

Fig. S22  $^{13}\text{C}$  NMR (126 MHz,  $\text{CD}_3\text{CN}$ ) spectrum of  $[\text{Ru}(\text{tmphen})_2(\text{DIP})](\text{PF}_6)_2$ .

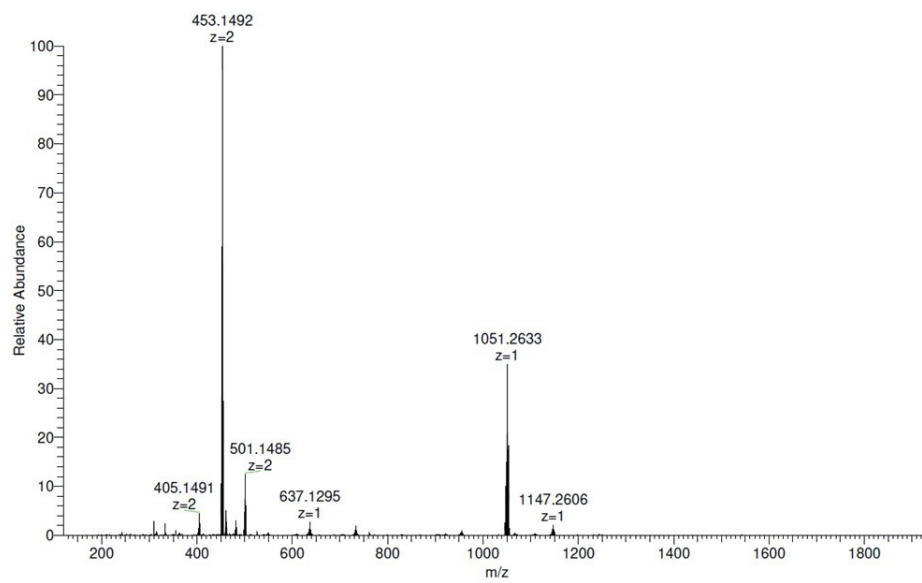

**Fig. S23** HRMS spectrum of [Ru(tmphen)<sub>2</sub>(DIP)](PF<sub>6</sub>)<sub>2</sub>.

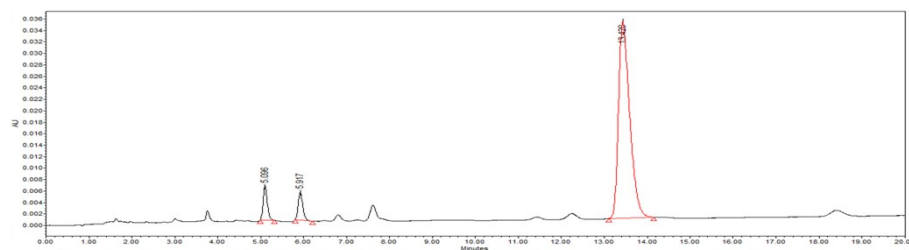

**Fig. S24** HPLC of [Ru(tmphen)<sub>2</sub>(DIP)](PF<sub>6</sub>)<sub>2</sub>.

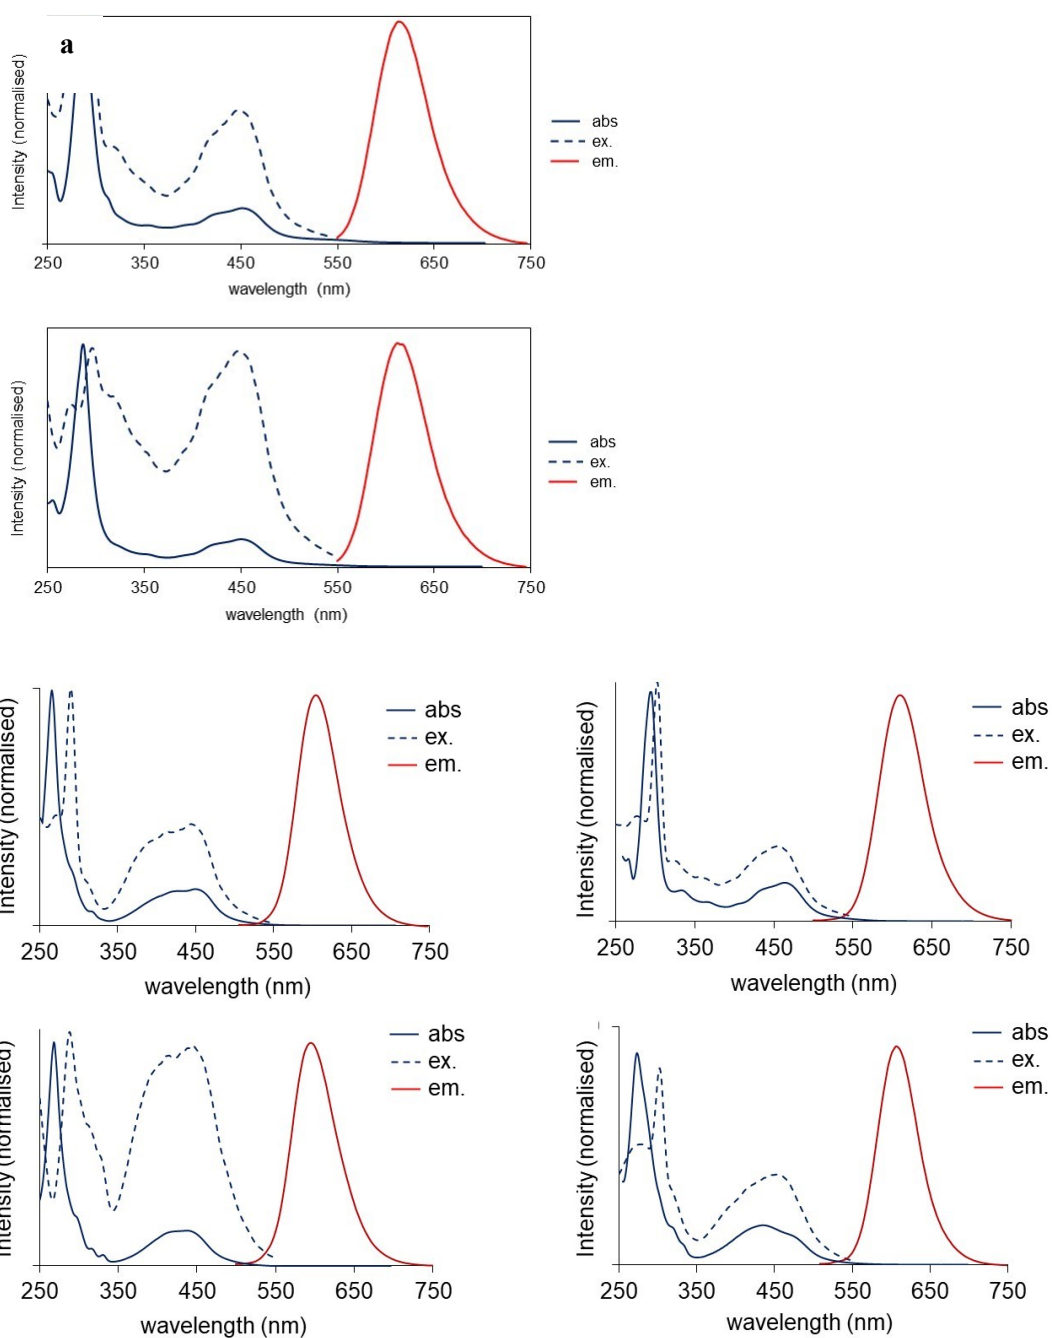

**Fig. S25** (a) Overlaid absorption (blue, solid), excitation (blue, dashed,  $\lambda_{\text{em}} = 610$  nm) and emission (red, solid,  $\lambda_{\text{ex}} = 450$  nm) spectra of [Ru(bpy)<sub>3</sub>](PF<sub>6</sub>)<sub>2</sub> (top) and commercial reference (bottom). (b) Overlaid absorption (blue, solid), excitation (blue, dashed,  $\lambda_{\text{em}} = 610$  nm) and emission (red, solid,  $\lambda_{\text{ex}} = 450$  nm) spectra of [Ru(phen)<sub>3</sub>](PF<sub>6</sub>)<sub>2</sub> (top left), [Ru(4,4'-dmbpy)<sub>3</sub>](PF<sub>6</sub>)<sub>2</sub> (top right), [Ru(tmphen)<sub>3</sub>](PF<sub>6</sub>)<sub>2</sub> (bottom left) and [Ru(tmphen)<sub>2</sub>(DIP)](PF<sub>6</sub>)<sub>2</sub> in acetonitrile.

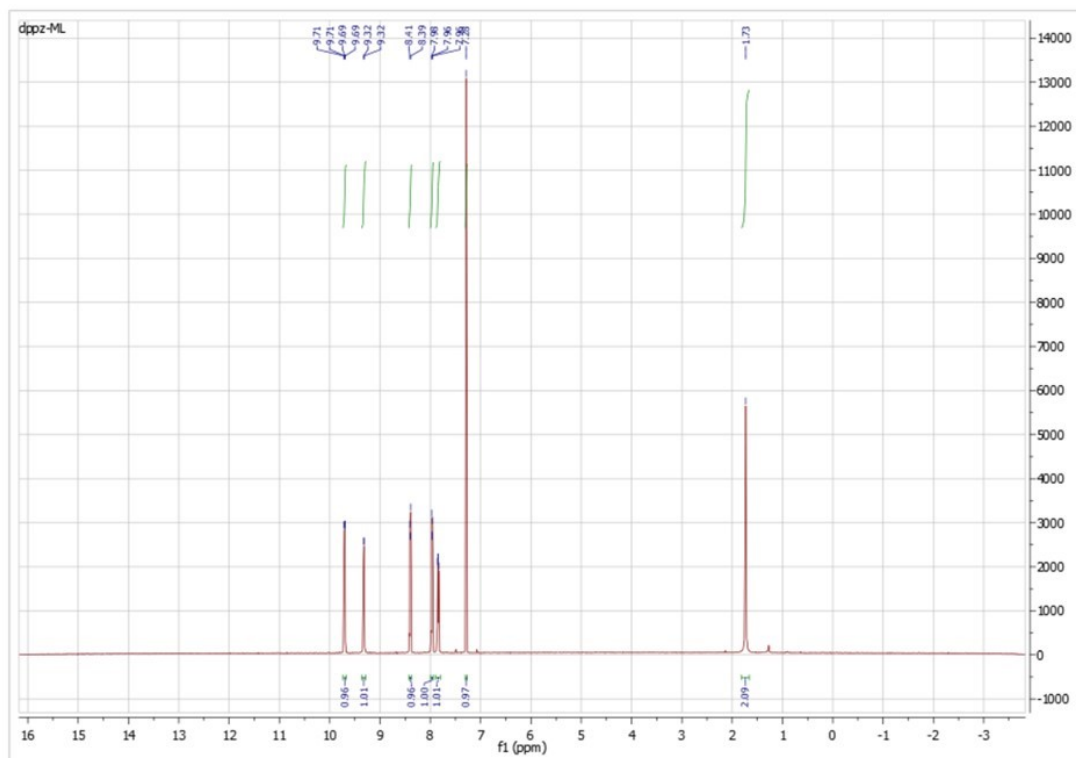

Fig. S26  $^1\text{H}$  NMR (500 MHz,  $\text{CDCl}_3$ ) spectrum of dppz.

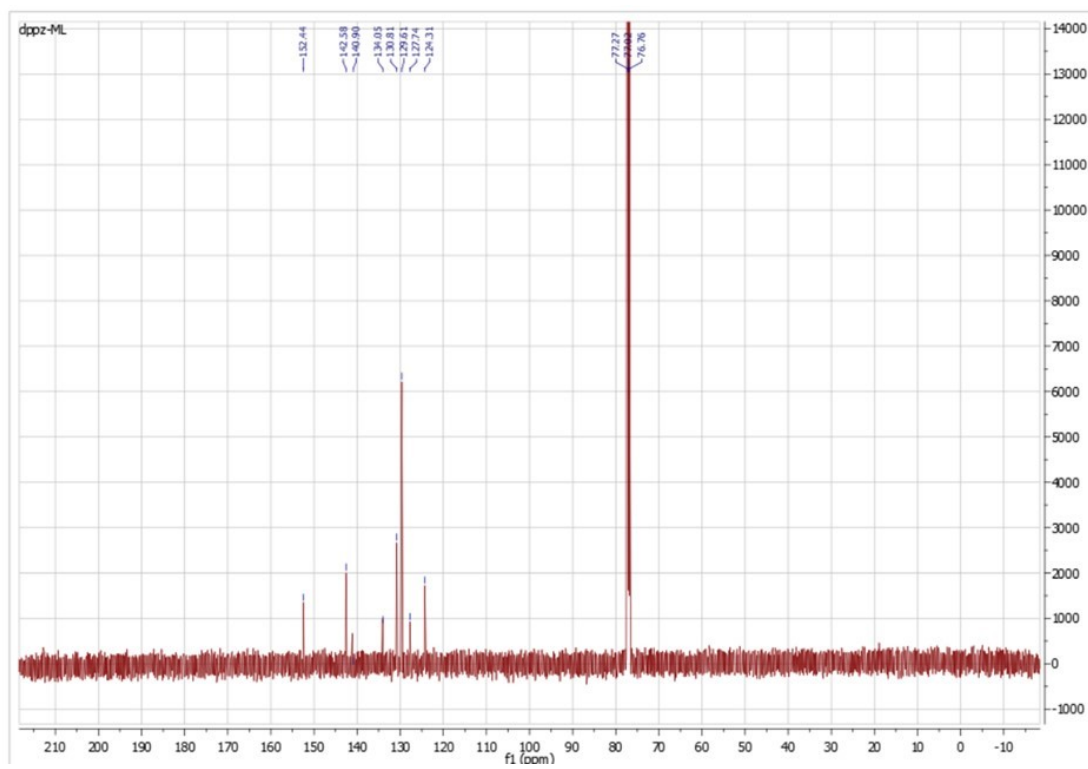

Fig. S27  $^{13}\text{C}$  NMR (126 MHz,  $\text{CDCl}_3$ ) spectrum of dppz.



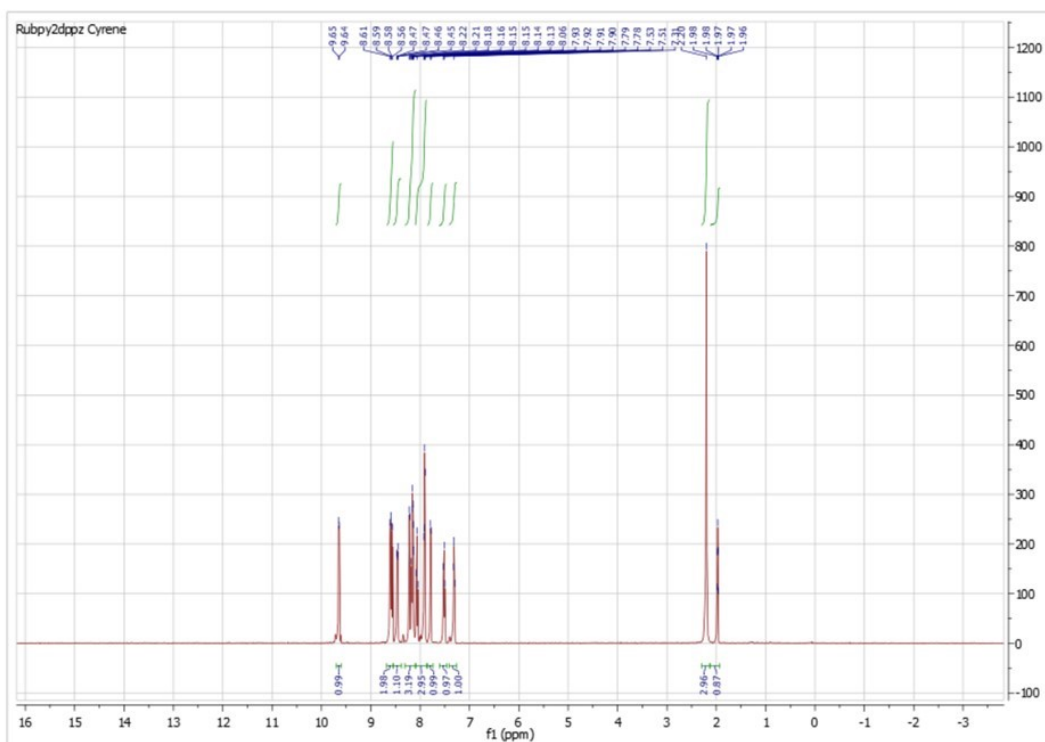

**Fig. S28**  $^1\text{H}$  NMR (500 MHz,  $\text{CD}_3\text{CN}$ ) spectrum of  $[\text{Ru}(\text{bpy})_2(\text{dppz})](\text{PF}_6)_2$ .

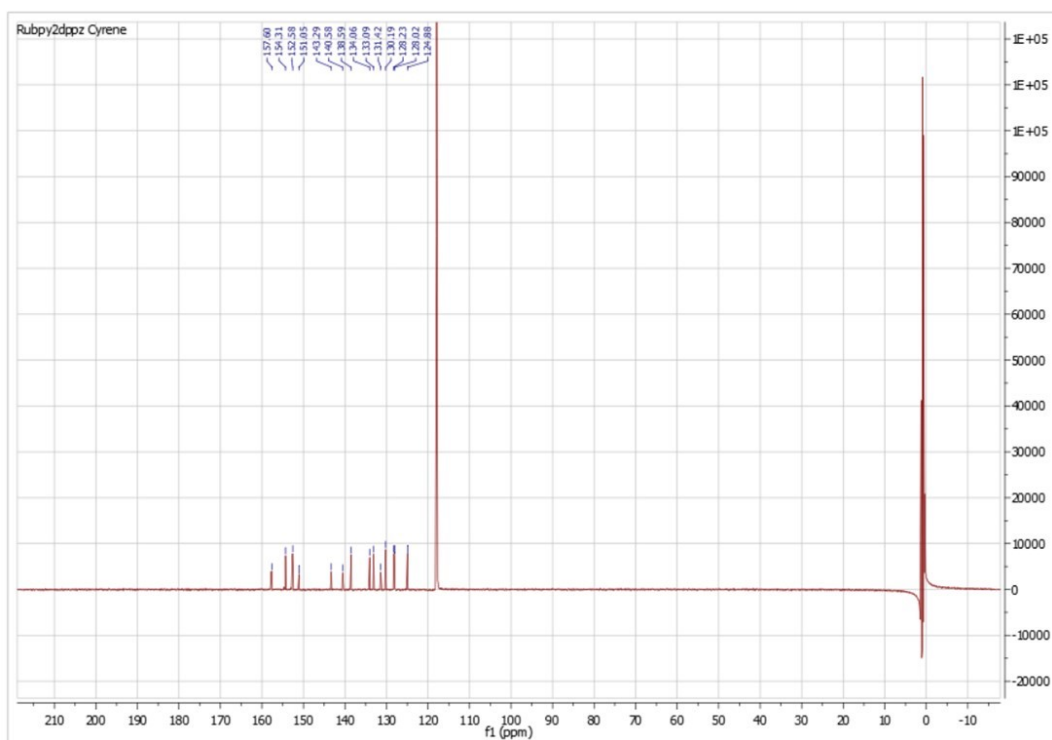

**Fig. S29**  $^{13}\text{C}$  NMR (126 MHz,  $\text{CD}_3\text{CN}$ ) spectrum of  $[\text{Ru}(\text{bpy})_2(\text{dppz})](\text{PF}_6)_2$ .

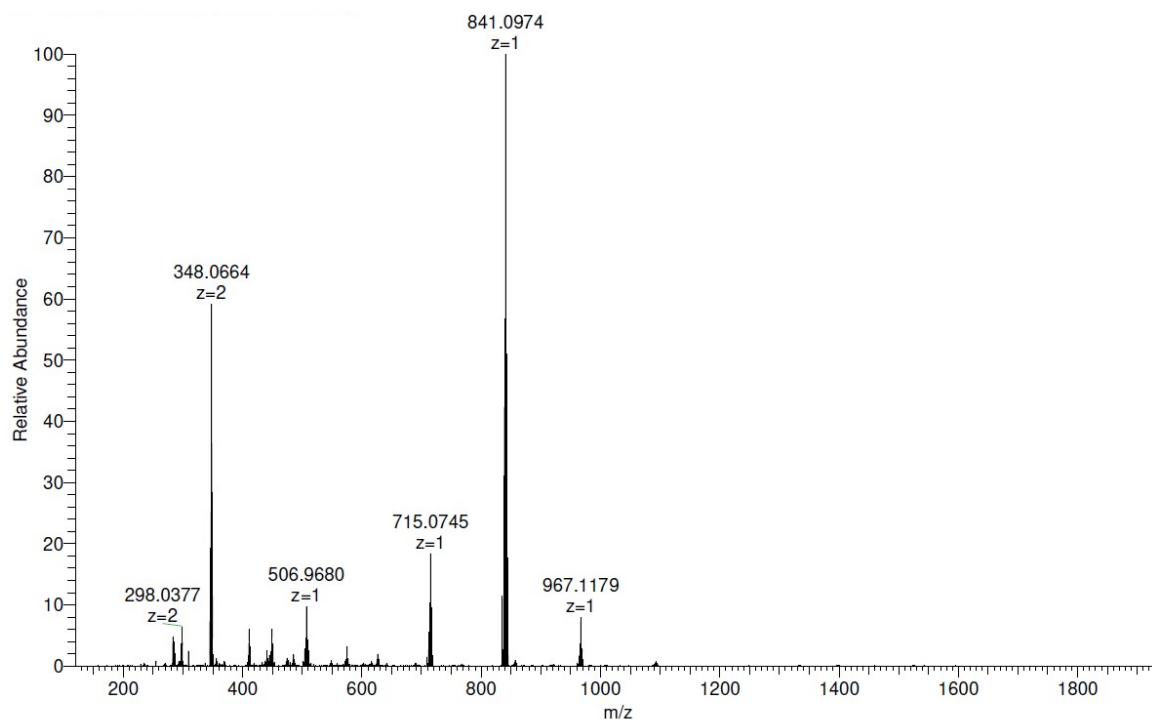

**Fig. S30** HRMS spectrum of  $[\text{Ru}(\text{bpy})_2(\text{dppz})](\text{PF}_6)_2$ .

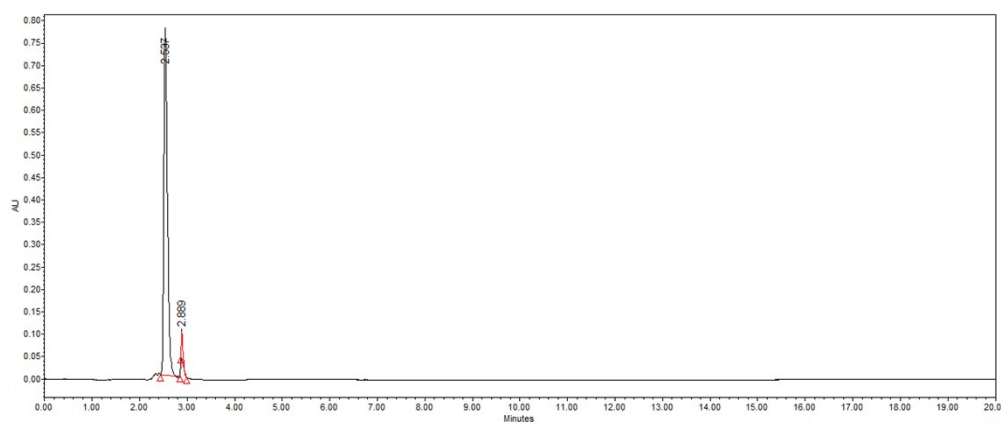

**Fig. S31** HPLC of  $[\text{Ru}(\text{bpy})_2(\text{dppz})](\text{PF}_6)_2$ .

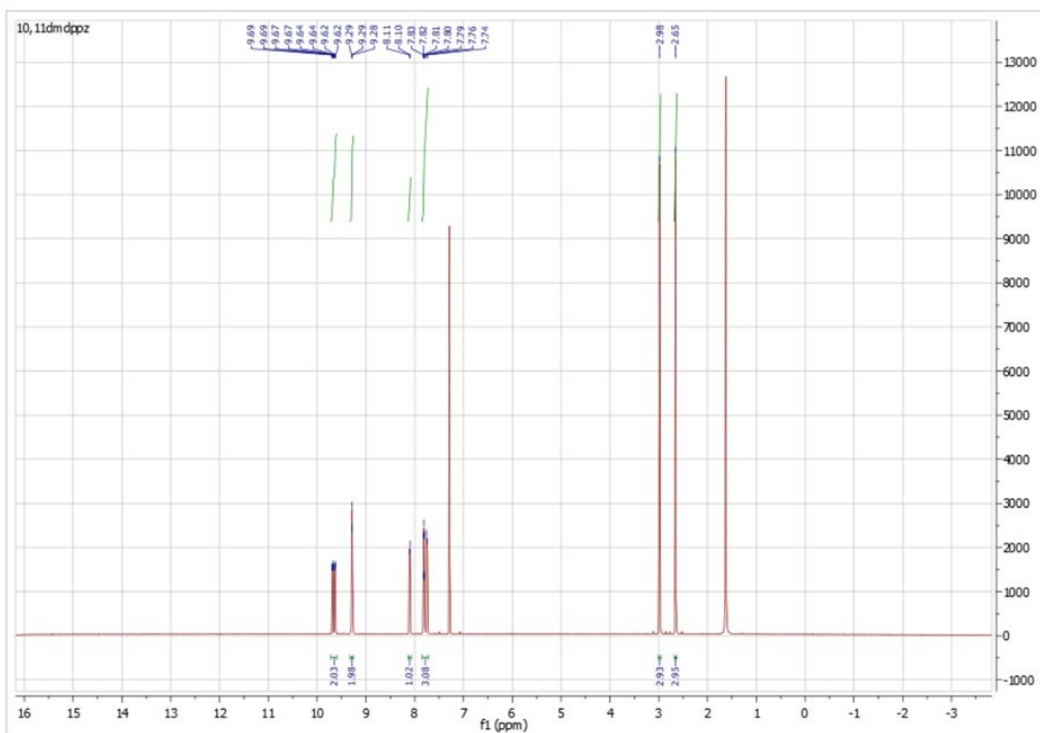

Fig. S32  $^1\text{H}$  NMR (500 MHz,  $\text{CDCl}_3$ ) spectrum of 10,11-dmdppz.

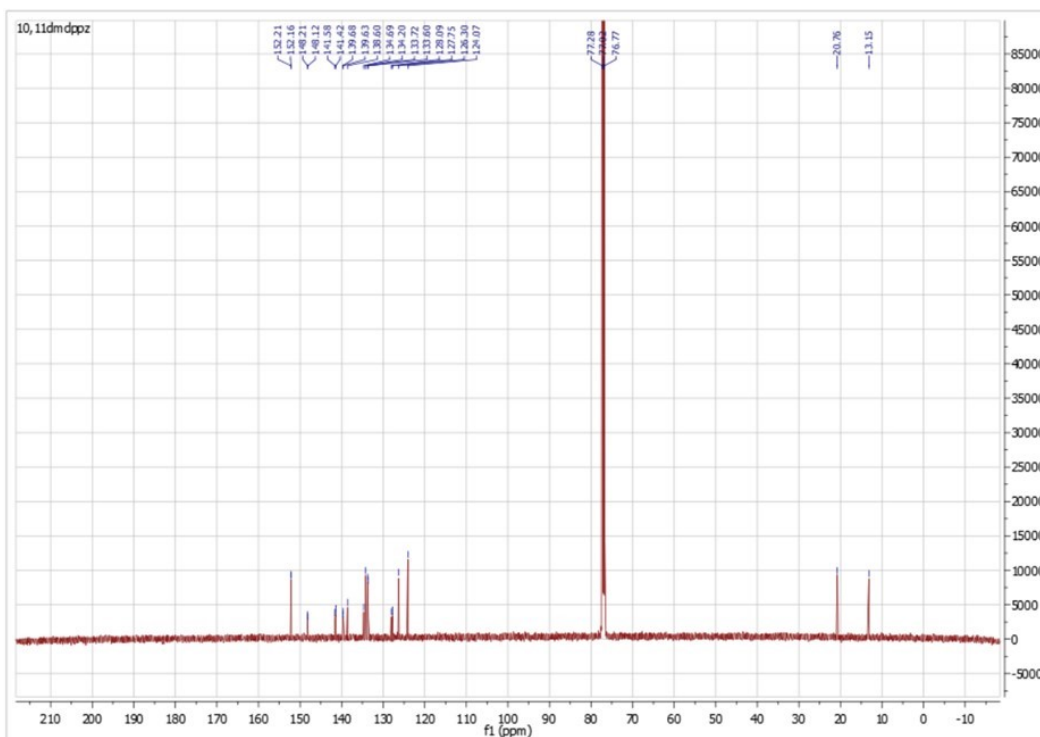

Fig. S33  $^{13}\text{C}$  NMR (126 MHz,  $\text{CDCl}_3$ ) spectrum of 10,11-dmdppz.

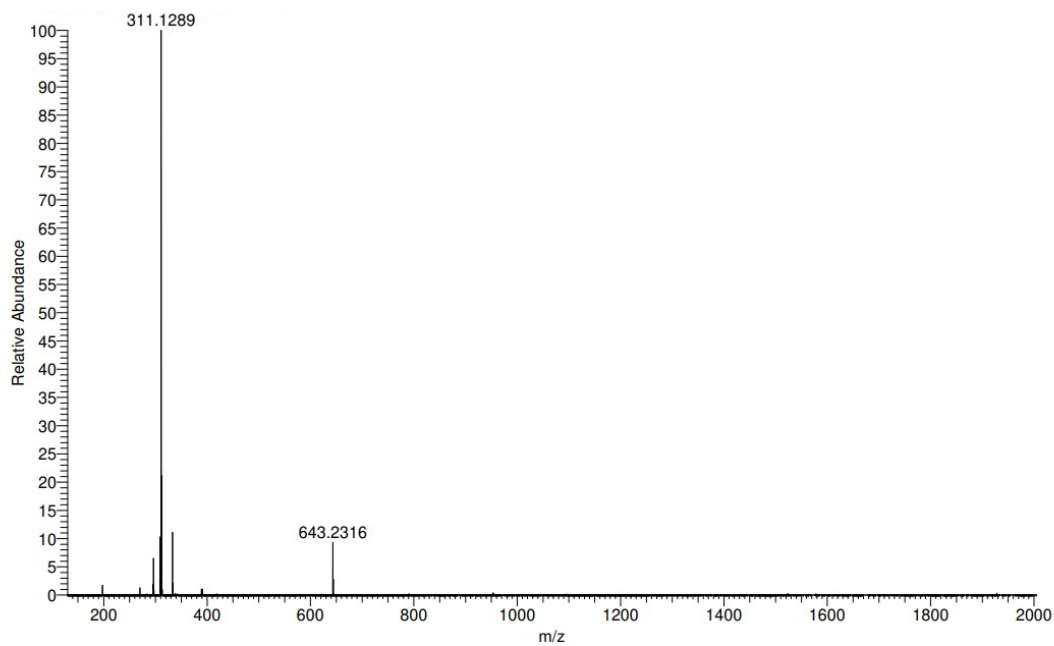

Fig. S34 HRMS spectrum of 10,11-dmdppz

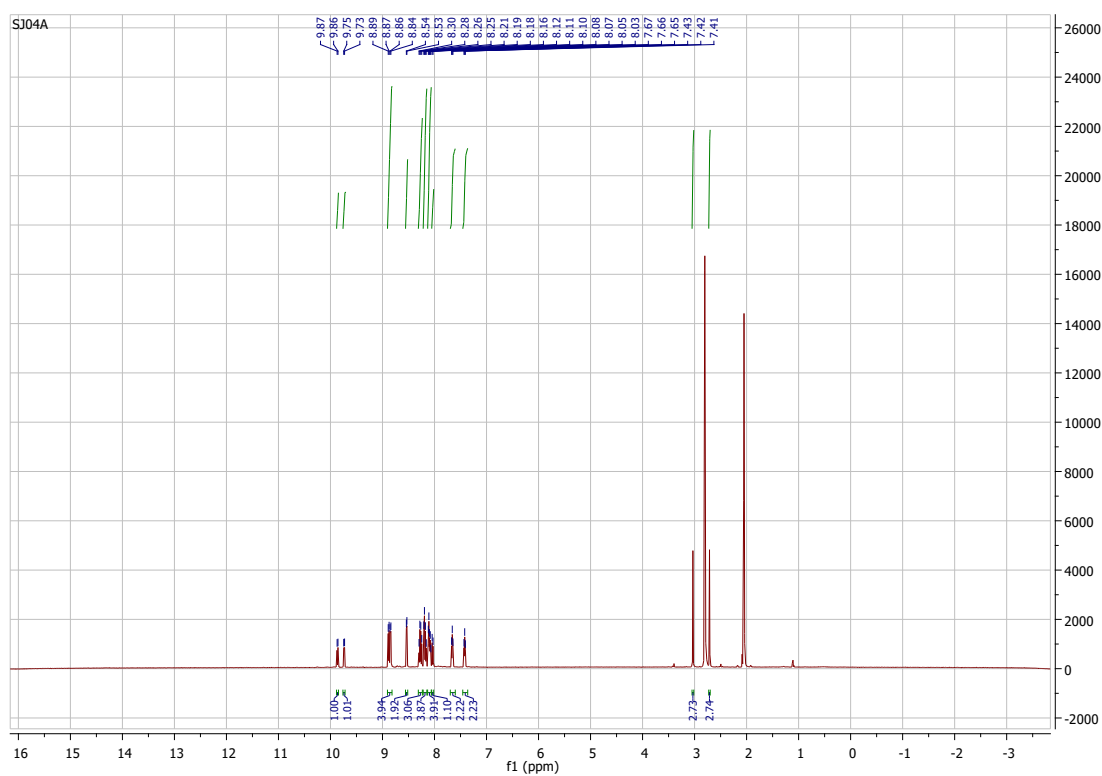

Fig. S35 <sup>1</sup>H NMR (500 MHz, Acetone) spectrum of [Ru(bpy)<sub>2</sub>(10,11-dmdppz)](PF<sub>6</sub>)<sub>2</sub>.

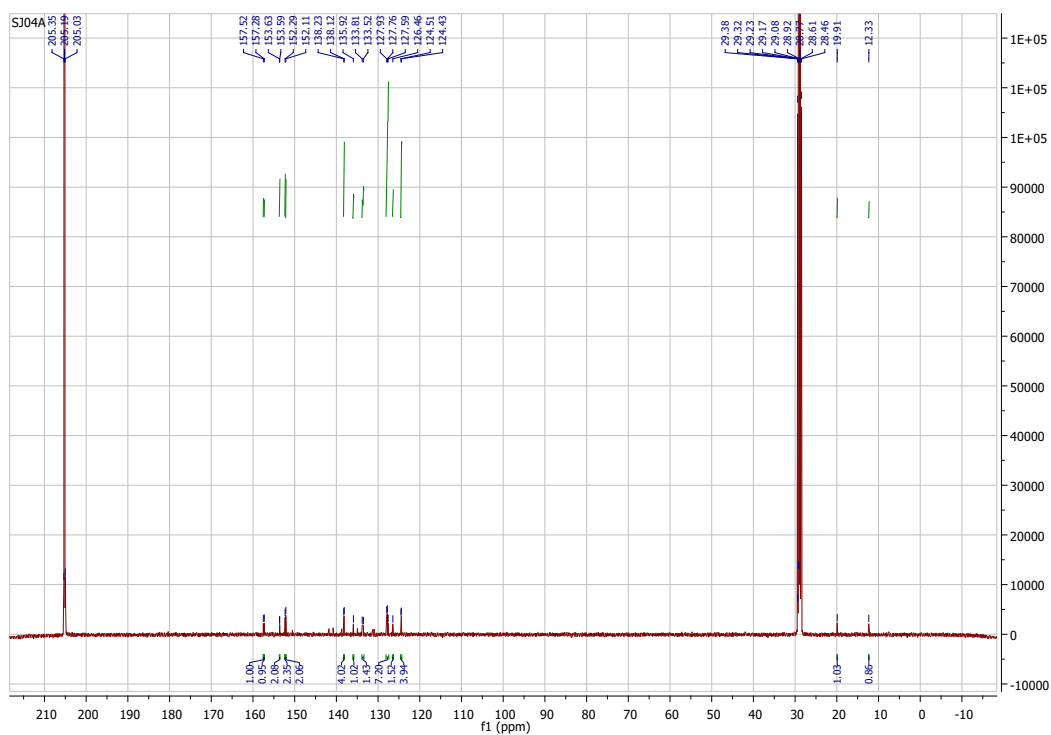

Fig. S36  $^{13}\text{C}$  NMR (126 MHz, acetone) spectrum of  $[\text{Ru}(\text{bpy})_2(10,11\text{-dmdppz})](\text{PF}_6)_2$ .

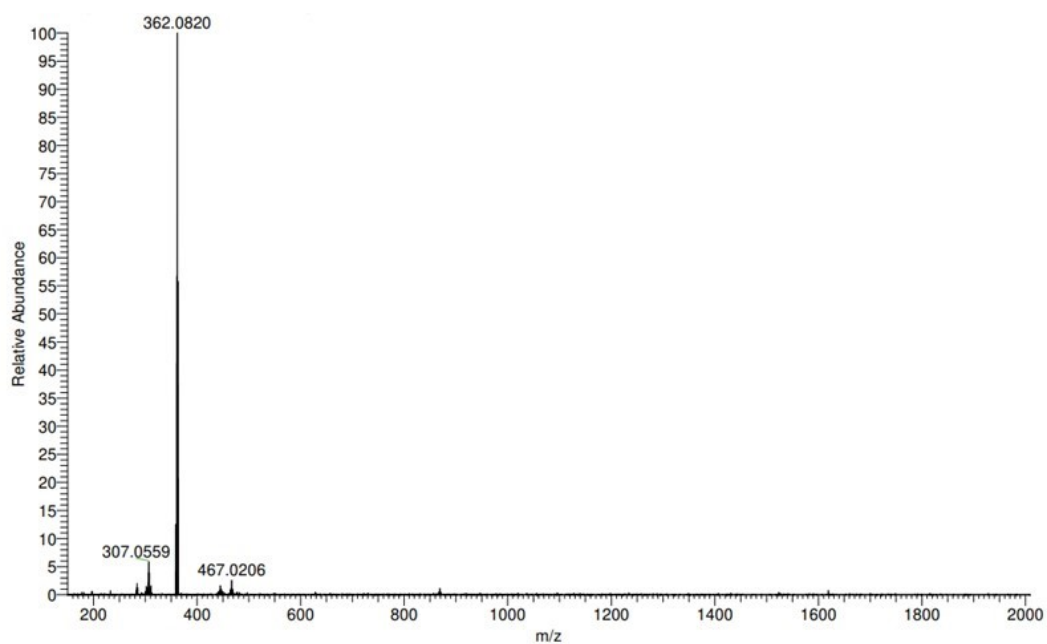

Fig. S37 HRMS spectrum of  $[\text{Ru}(\text{bpy})_2(10,11\text{-dmdppz})](\text{PF}_6)_2$ .

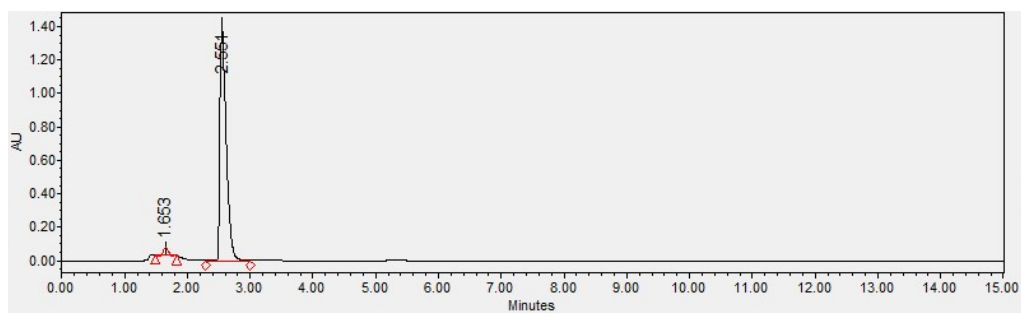

**Fig. S38** HPLC of  $[\text{Ru}(\text{bpy})_2(10,11\text{-dmdppz})](\text{PF}_6)_2$ .

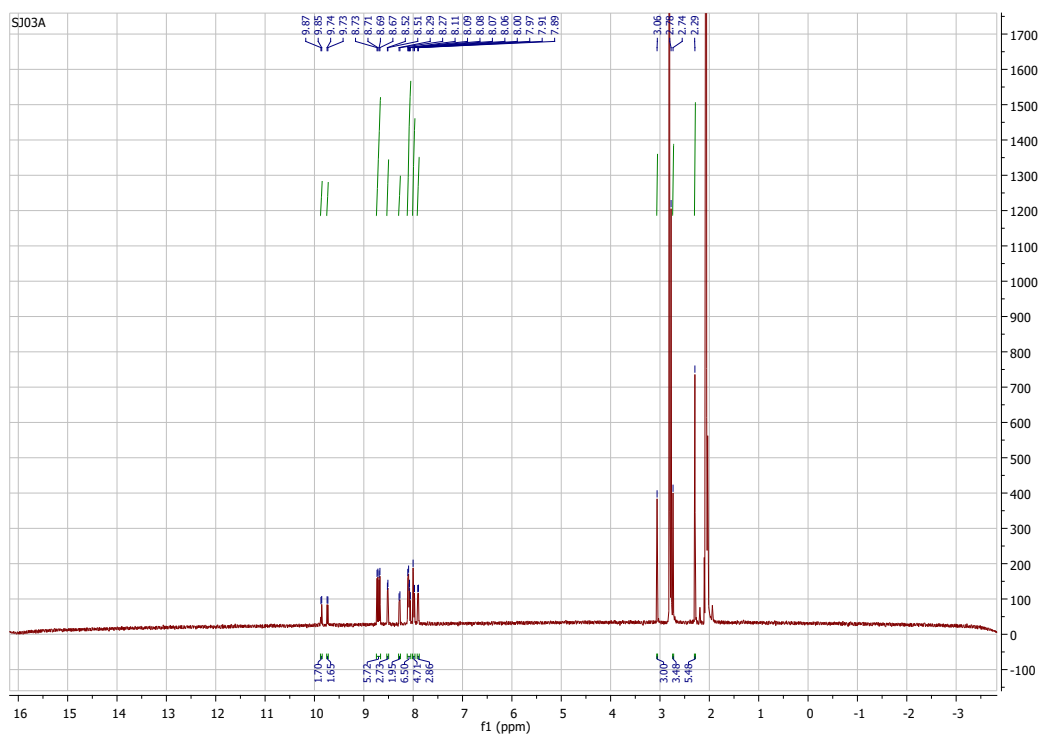

**Fig. S39**  $^1\text{H}$  NMR (500 MHz, Acetone) spectrum of  $[\text{Ru}(5,5'\text{-dmbpy})_2(10,11\text{-dmdppz})](\text{PF}_6)_2$ .

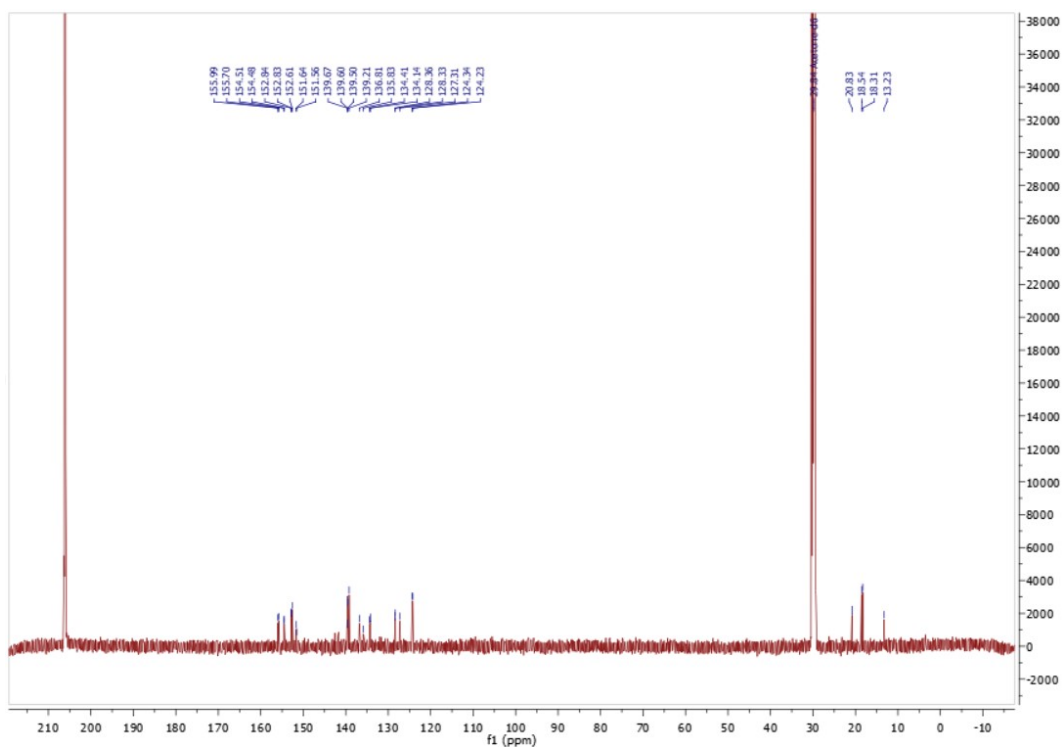

**Fig. S40**  $^{13}\text{C}$  NMR (126 MHz, acetone) spectrum of  $[\text{Ru}(5,5'\text{-dmbpy})_2(10,11\text{-dmdppz})](\text{PF}_6)_2$ .

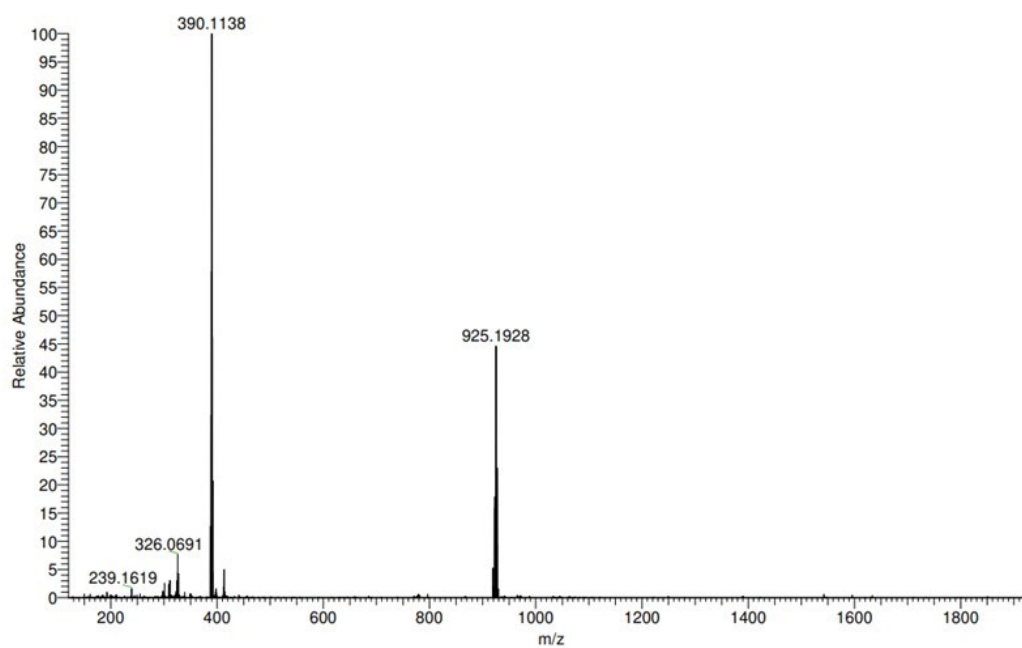

**Fig. S41** HRMS spectrum of  $[\text{Ru}(5,5'\text{-dmbpy})_2(10,11\text{-dmdppz})](\text{PF}_6)_2$ .

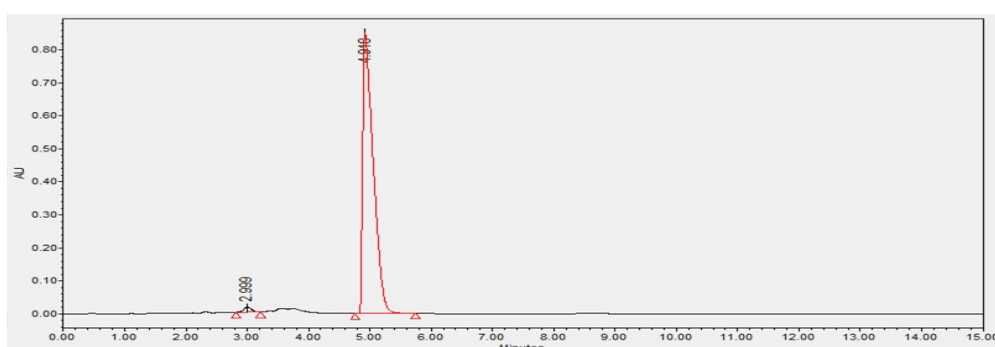

**Fig. S42** HPLC of  $[\text{Ru}(5,5'\text{-dmbpy})_2(10,11\text{-dmdppz})](\text{PF}_6)_2$ .

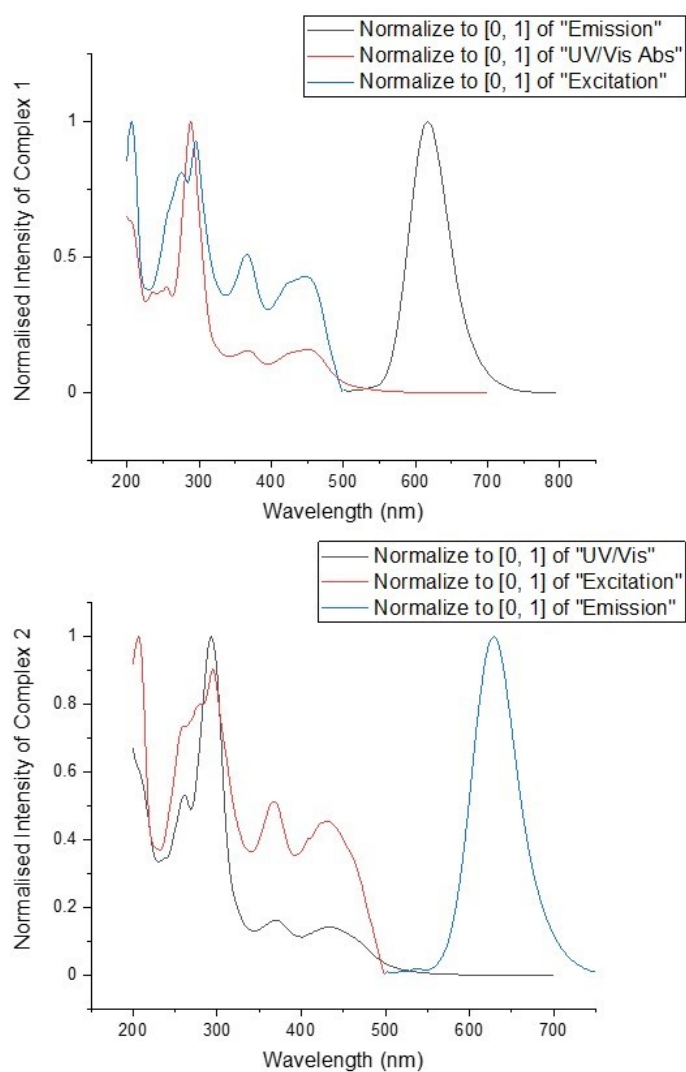

**Fig. S43** Overlaid absorption, excitation ( $\lambda_{\text{em}} = 610 \text{ nm}$ ) and emission ( $\lambda_{\text{ex}} = 450 \text{ nm}$ ) spectra of **1** and **2** in acetonitrile.



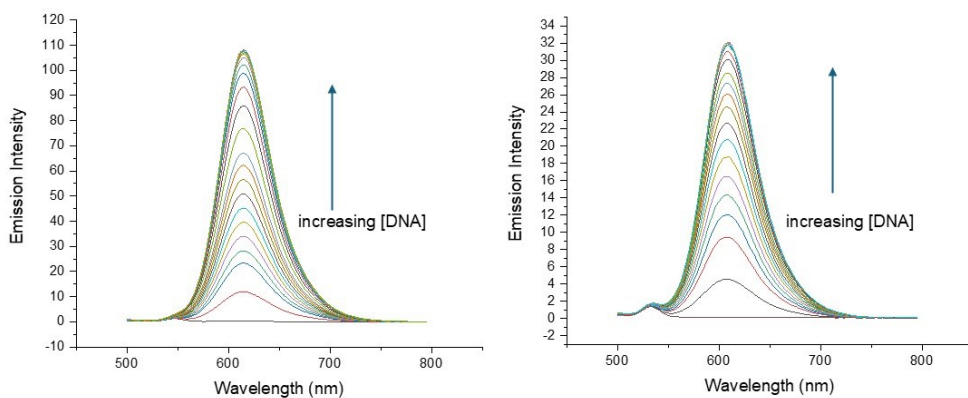

**Fig. S44** Emission of **1** and **2** in Tris buffer with addition of DNA ( $\lambda_{\text{ex}} = 450 \text{ nm}$ ).

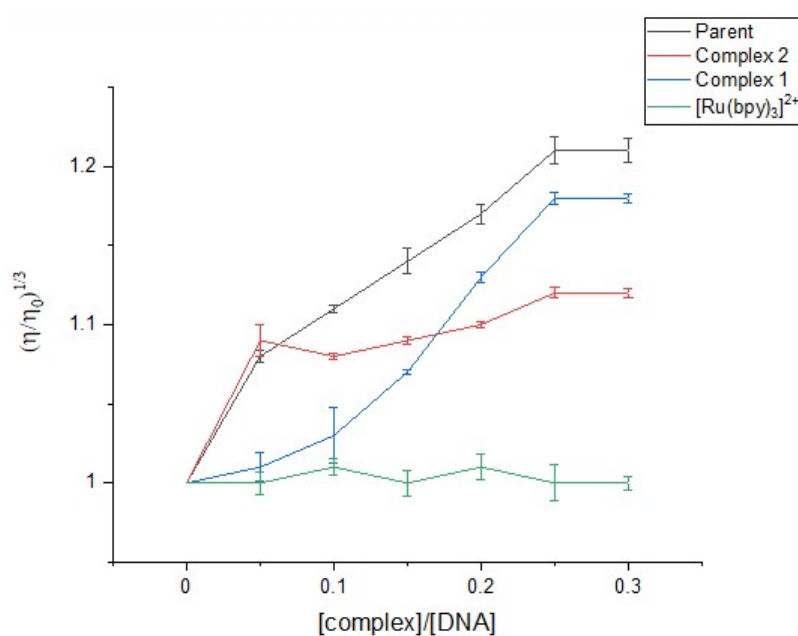

**Fig. S45** Plot of relative viscosity  $(\eta/\eta_0)^{1/3}$  of DNA versus  $[\text{complex}]/[\text{DNA}]$  upon addition of **1** or **2**. Intercalator  $[\text{Ru}(\text{bpy})_2(\text{dppz})]^{2+}$ , “parent”, and non-intercalator  $[\text{Ru}(\text{bpy})_3]^{2+}$  employed for comparison.

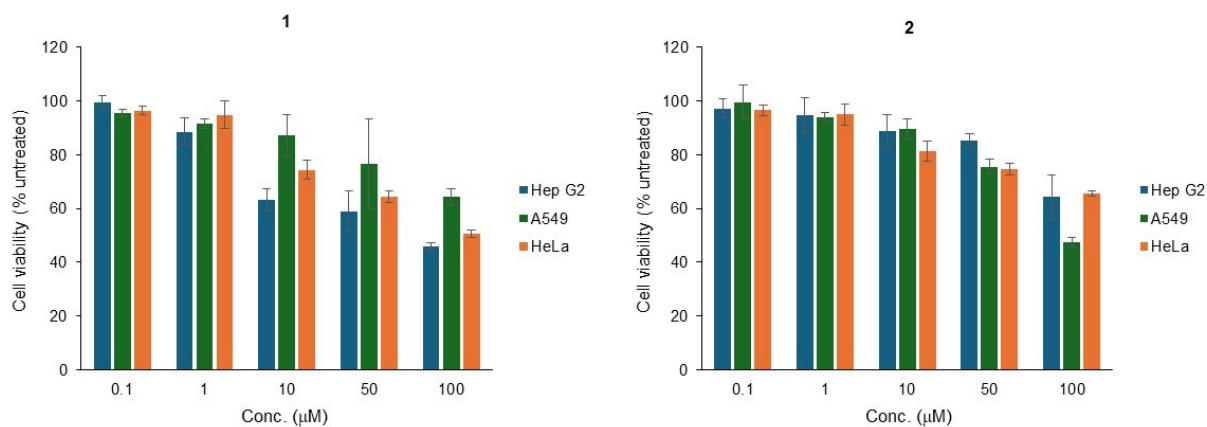

**Fig. S46** Cytotoxicity of **1** and **2** towards Hep G2 human hepatocellular carcinoma, A549 human lung cancer or HeLa human cervical carcinoma cells. Cell viability determined by MTT assay (48 h incubation time).

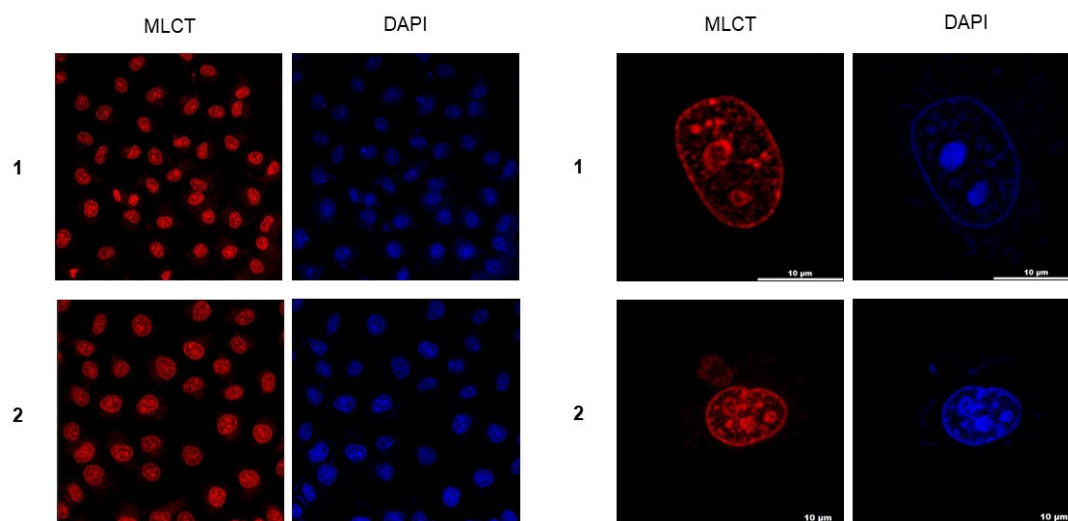

**Fig. S47** Fixed HeLa cells co-stained with **1** or **2** and DAPI.

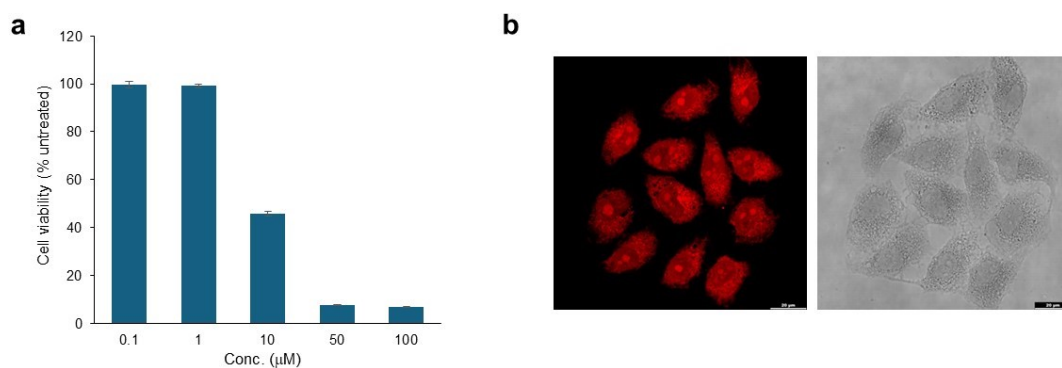

**Fig. S48** a) Cytotoxicity of  $[\text{Ru}(\text{tmphen})_2(\text{DIP})](\text{PF}_6)_2$  towards HeLa human cervical carcinoma cells. Cell viability determined by MTT assay (48 h incubation time). b) Fixed HeLa cells stained with  $[\text{Ru}(\text{tmphen})_2(\text{DIP})](\text{PF}_6)_2$  (10  $\mu\text{M}$ , 30 min).

## References

- 1 C. E. Elgar, N. A. Yusoh, P. R. Tiley, N. Kolozsvári, L. G. Bennett, A. Gamble, E. V Péan, M. L. Davies, C. J. Staples, H. Ahmad and M. R. Gill, *J. Am. Chem. Soc.*, 2023, **145**, 1236–1246.
- 2 B. P. Sullivan, D. J. Salmon and T. J. Meyer, *Inorg. Chem.*, 1978, **17**, 3334–3341.
- 3 A. E. Friedman, J. C. Chambron, J. P. Sauvage, N. J. Turro and J. K. Barton, *J. Am. Chem. Soc.*, 1990, **112**, 4960–4962.
- 4 N. A. Yusoh, P. R. Tiley, S. D. James, S. N. Harun, J. A. Thomas, N. Saad, L.-W. Hii, S. L. Chia, M. R. Gill and H. Ahmad, *J. Med. Chem.*, 2023, **66**, 6922–6937.
- 5 Z. A. E. Waller, S. A. Sewitz, S.-T. D. Hsu and S. Balasubramanian, *J. Am. Chem. Soc.*, 2009, **131**, 12628–12633.
- 6 A. M. Brouwer, *Pure App Chem*, 2011, **83**, 2213–2228.
- 7 I. Jarmoskaite, I. AlSadhan, P. P. Vaidyanathan and D. Herschlag, *Elife*, 2020, **9**, e57264.
